1 **Antibodies generated *in vitro* and *in vivo* elucidate design of a thermostable**  
2 **ADDomer COVID-19 nasal nanoparticle vaccine**

3 Dora Buzas<sup>1,2</sup>, H Adrian Bunzel<sup>2</sup>, Oskar Staufer<sup>1,3</sup>, Emily J Milodowski<sup>4</sup>, Grace L Edmunds<sup>4</sup>, Joshua  
4 C Bufton<sup>2</sup>, Beatriz V Vidana Mateo<sup>4</sup>, Sathish K N Yadav<sup>2</sup>, Kapil Gupta<sup>2,6</sup>, Charlotte Fletcher<sup>2</sup>, Maia  
5 Kavanagh Williamson<sup>5</sup>, Alexandra Harrison<sup>2</sup>, Ufuk Borucu<sup>2</sup>, Julien Capin<sup>2</sup>, Ore Francis<sup>4</sup>, Georgia  
6 Balchin<sup>2</sup>, Sophie Hall<sup>2</sup>, Mirella Vivoli Vega<sup>2</sup>, Fabien Durbesson<sup>7</sup>, Renaud Vincentelli<sup>7</sup>, Joe Roe<sup>4</sup>,  
7 Linda Wooldridge<sup>4</sup>, Rachel Burt<sup>4</sup>, J L Ross Anderson<sup>2</sup>, Adrian J Mulholland<sup>8</sup>, Bristol UNCOVER  
8 Group<sup>9</sup>, Jonathan Hare<sup>6</sup>, Mick Bailey<sup>4</sup>, Andrew D Davidson<sup>5</sup>, Adam Finn<sup>9,10</sup>, David Morgan<sup>5</sup>, Jamie  
9 Mann<sup>4</sup>, Joachim Spatz<sup>1,11</sup>, Frederic Garzoni<sup>6\*</sup>, Christiane Schaffitzel<sup>2,9\*</sup>, Imre Berger<sup>1,2,8,9\*</sup>

10

11 <sup>1</sup> Max Planck Bristol Centre for Minimal Biology, Cantock's Close, Bristol BS8 1TS, UK

12 <sup>2</sup> School of Biochemistry, University of Bristol, 1 Tankard's Close, Bristol BS8 1TD, UK

13 <sup>3</sup> Leibniz Institute for New Materials, Helmholtz Institute for Pharmaceutical Research and Center  
14 for Biophysics, Saarland University, 66123 Saarbrücken, Germany

15 <sup>4</sup> Bristol Veterinary School, University of Bristol, Bristol BS40 5DU UK

16 <sup>5</sup> School of Cellular and Molecular Medicine, University of Bristol, Bristol, BS8 1TD, UK

17 <sup>6</sup> Imophoron Ltd, Science Creates Old Market, Midland Rd, Bristol BS2 0JZ UK

18 <sup>7</sup> Architecture et Fonction des Macromolécules Biologiques, UMR 7257, CNRS, Aix-Marseille  
19 Université, Marseille, France

20 <sup>8</sup> School of Chemistry, University of Bristol, Cantock's Close, Bristol BS8 1TS, UK

21 <sup>9</sup> Bristol University COVID-19 Emergency Research Group, Bristol BS8 1TH UK

22 <sup>10</sup> Children's Vaccine Centre, Bristol Medical School, Upper Maudline Street, Bristol BS2 8EF UK

23 <sup>11</sup> Max Planck Institute for Medical Research, Jahnstraße 29, 69120 Heidelberg, Germany

24 \* Correspondence Frederic Garzoni, 0044 (0)78 8061 3161 fred@imophoron.com

25 Christiane Schaffitzel 0044 (0)117 394 1869 cb14941@bristol.ac.uk

26 Imre Berger, 0044 (0)117 394 1857 imre.berger@bristol.ac.uk

## 27 **Abstract**

28 COVID-19 continues to damage populations, communities and economies worldwide. Vaccines have  
29 reduced COVID-19-related hospitalisations and deaths, primarily in developed countries. Persisting  
30 infection rates, and highly transmissible SARS-CoV-2 Variants of Concern (VOCs) causing repeat  
31 and breakthrough infections, underscore the ongoing need for new treatments to achieve a global  
32 solution. Based on ADDomer, a self-assembling protein nanoparticle scaffold, we created  
33 ADDoCoV, a thermostable COVID-19 candidate vaccine displaying multiple copies of a SARS-  
34 CoV-2 receptor binding motif (RBM)-derived epitope. *In vitro* generated neutralising nanobodies  
35 combined with molecular dynamics (MD) simulations and electron cryo-microscopy (cryo-EM)  
36 established authenticity and accessibility of the epitopes displayed. A Gigabody comprising  
37 multimerized nanobodies prevented SARS-CoV-2 virion attachment with picomolar EC<sub>50</sub>.  
38 Antibodies generated by immunising mice cross-reacted with VOCs including Delta and Omicron.  
39 Our study elucidates nasal administration of ADDomer-based nanoparticles for active and passive  
40 immunisation against SARS-CoV-2 and provides a blueprint for designing nanoparticle reagents to  
41 combat respiratory viral infections.

42

## 43 **Introduction**

44 As of January 2023, the COVID-19 pandemic, caused by severe acquired respiratory syndrome  
45 coronavirus 2 (SARS-CoV-2), continues to spread globally, with over 660 million confirmed cases  
46 and close to 7 million deaths reported worldwide according to the World Health Organisation  
47 (WHO). The economic damage caused by the pandemic has been significant, with many countries  
48 having experienced severe economic downturns as a result of lockdowns and other non-  
49 pharmaceutical intervention measures implemented to slow the spread of the virus. In an  
50 unprecedented effort, a large number of COVID-19 vaccine candidates were developed at record  
51 speed<sup>1-4</sup>, and several were authorised for emergency use or received full approval by regulatory  
52 agencies around the world<sup>1</sup>. Among these, prominent examples include the Pfizer-BioNTech

53 (Cominarty) and Moderna (Spikevax) vaccines which use lipid-encapsulated messenger RNA  
54 (mRNA) to instruct cells to produce the SARS-CoV-2 spike glycoprotein (S) to trigger an immune  
55 response<sup>5-10</sup>. The Oxford-AstraZeneca ((Vaxzevria) and Johnson & Johnson (Jcovden) vaccines use  
56 adenovirus as a vector to induce production of SARS-CoV-2 S in the body<sup>11-15</sup>. The Novavax  
57 vaccine (Nuvaxovid), a protein subunit vaccine, uses recombinant S proteins attached to a lipidic  
58 matrix for immunisation<sup>16-18</sup>. These vaccines have been shown to be effective in preventing severe  
59 COVID-19, with the mRNA vaccines exhibiting highest efficacy rates (~95%) albeit relatively short-  
60 lived<sup>1,19</sup>.

61 All currently licensed COVID-19 vaccines require refrigeration to maintain their stability and  
62 potency and depend on a functioning cold-chain<sup>20,21</sup>. This renders distribution and storage logistics  
63 of the vaccines challenging, especially in areas with limited access to refrigeration, which includes  
64 most developing nations with often remote or impoverished regions. In fact, cold-chain logistics  
65 issues are one of the main sources for vaccine spoilage and wastage<sup>22-24</sup>. Therefore, developing  
66 thermostable vaccines that are not dependent on cold-chains, would greatly simplify the vaccine roll-  
67 out process and increase accessibility to vaccines globally.

68 Nanoparticle-based vaccines hold great promise for overcoming the limitations of current  
69 vaccine technologies<sup>25-27</sup>. Shortly before the pandemic, we introduced ADDomer, a synthetic self-  
70 assembling protein nanoparticle platform for highly efficient vaccination by genetically encoded  
71 multiepitope display<sup>28</sup>. ADDomer derives from a single protein component of adenovirus, which  
72 forms pentons at the vertices of the viral capsid, providing a base for the attachment of the adenoviral  
73 fibre<sup>29</sup>. When produced in isolation, 60 copies of this penton-base protomer spontaneously self-  
74 assemble into a dodecahedron comprising 12 pentons. This adenovirus derived dodecamer, or  
75 ADDomer, is stable at temperatures exceeding 45°C and can be stored at ambient temperature for  
76 prolonged periods<sup>28</sup>. We showed that exposed loops on the ADDomer surface can function as  
77 insertion sites for rationally selected immunogenic peptide epitopes that range in sequence and size,

78 resulting in potent vaccine candidates against a range of human and veterinary infectious diseases  
79 <sup>28,30</sup>.

80 In this study, initiated during the pandemic lockdowns, we set out to develop ADDoCoV, a  
81 thermostable ADDomer-based COVID-19 vaccine, with the potential to overcome limitations  
82 associated with the cold-chain challenge, while maintaining the advantages of ADDomer notably the  
83 ease of production of a one-component particle harbouring the genetically encoded antigens. We  
84 validate our ADDoCoV design by near-atomic resolution electron cryo-microscopy (cryo-EM) and  
85 molecular dynamics (MD) in a hybrid approach. We confirm authenticity and accessibility of the  
86 immunogenic epitope displayed by using Ribosome Display <sup>31</sup>, a powerful *in vitro* selection  
87 technique, to generate neutralising antibodies *in vitro* from a naïve nanobody library. We  
88 demonstrate the prowess of our ADDoCoV design by immunising mice, eliciting antigen-specific  
89 IgA and IgG antibody responses *in vivo*, notably also by intranasal vaccination, a route unparalleled  
90 in terms of ease of administration, and with the potential to induce stronger and more long lasting  
91 indirect effects, especially in the context of a largely immune-primed global human population.  
92 Taken together, our approach provides a blueprint for the design of thermostable, cost-effective,  
93 convenient to manufacture, easy to administer, single-component vaccines, with the potential to  
94 prevent and combat infectious disease outbreaks also in resource-limited settings.

95

## 96 **Results**

### 97 **Self-assembling thermostable ADDomer-based COVID-19 candidate vaccine ADDoCoV**

98 The SARS-CoV-2 virion surface is decorated by S, a trimeric glycoprotein mediating cell attachment  
99 and infection <sup>32-34</sup>. Each S monomer contains a receptor binding domain (RBD) comprising the  
100 receptor binding motif (RBM). In the open form adopted by S, the RBM is positioned to interact  
101 tightly with the cellular receptor, angiotensin converting enzyme 2 (ACE2) (Fig. 1a). Early in the  
102 pandemic when the sequence of SARS-CoV-2 S became available, we used alignments with SARS-  
103 CoV S to delineate peptide regions in the RBM which we could use as a putative antigenic epitope

104 for genetic insertion into the protomer we had designed that forms the ADDomer nanoparticle<sup>28</sup>. An  
105 epitope (AH) encompassing 33 amino acids of the SARS-CoV-2 Wuhan RBM spanning residues  
106 Y505 to Y473 inclusive (Fig. 1) was introduced into the insertion site of the variable loop (VL) of  
107 the protomer (Fig. 1b). The protomer adopts a bipartite structure (Fig. 1b,c), made up of a crown  
108 domain containing flexible loops and a jellyfold domain mediating multimerisation into pentons as  
109 well as the formation of the dodecahedron by establishing inter-penton contacts. Modelling by  
110 Rosetta design and molecular dynamics (MD) simulations revealed that AH exhibits considerable  
111 conformational flexibility that likely promotes antibody binding (Fig. 1c).

112 AH containing protomer was produced following our established protocol<sup>30</sup> resulting in  
113 highly purified ADDoCoV adopting the dodecahedral structure characteristic of this protein  
114 nanoparticle (Supplementary Fig. 1). We determined the cryo-EM structure of ADDoCoV at 2.36 Å  
115 resolution, providing near-atomic insights (Fig. 1d, Supplementary Figs. 2,3, Supplementary Table 1,  
116 Supplementary Movie 1). In a previous X-ray crystallographic study, a central  $\alpha$ -helix had been  
117 identified, thought to stabilize the adenoviral penton by coordinating a bivalent ion,  $\text{Ca}^{2+}$ , via  
118 glutamate residues<sup>35</sup>. In ADDoCoV, this  $\alpha$ -helix seemingly underwent a helix-to-disorder transition  
119 and cation coordination was not observed (Fig. 1e). ADDoCoV contains 60 AH epitopes exposed on  
120 the nanoparticle surface in flexible loops, available for antibody binding (Fig. 1f). We probed the  
121 dynamics of ADDoCoV by MD simulations guided by the cryo-EM structure. For about a third of  
122 the simulated trajectory, the AH epitope adopted a conformation closely resembling the arrangement  
123 observed in the open form of SARS-CoV-2 S, with the RBD in the ‘up’ position, positioned to  
124 engage ACE2 (Fig. 1e, Supplementary Fig. 4).

125 A key feature of the self-assembling ADDomer scaffold resides in its thermostability<sup>28</sup>. We  
126 observed virtually identical melting temperatures of ADDomer and ADDoCoV, confirming that,  
127 irrespective of AH epitope insertion, thermostability is maintained (Fig. 1g). The AH epitopes  
128 displayed on the ADDoCoV nanoparticle comprise 33 amino acid residues of the SARS-CoV-2  
129 RBM which is itself about 60 residues long. We deliberately chose the shorter AH epitope for

130 ADDoCoV to preclude potentially detrimental effects that could be caused by ADDoCoV sticking to  
131 cellular receptor ACE2. Size exclusion chromatography (SEC) of a mixture of ADDoCoV and  
132 highly purified, recombinant ACE2 showed no association with ACE2, notwithstanding the presence  
133 of 60 copies of the AH epitope on the ADDoCoV nanoparticle (Fig. 1h).

134 In summary, we designed ADDoCoV comprising 60 copies of AH, a SARS-CoV-2 RBM  
135 derived epitope, determined ADDoCoV architecture and integrity at near atomic resolution, sampled  
136 the dynamics of the AH epitopes displayed on the ADDoCoV surface and demonstrated  
137 thermostability of this COVID-19 nanoparticle vaccine candidate.

138

### 139 ***In vitro* generated SARS-CoV-2 neutralising nanobody binders by Ribosome Display**

140 The rationale for the ADDoCoV vaccine design is to elicit antibodies that can bind the RBM, and  
141 thus prevent SARS-CoV-2 attachment to ACE2, neutralising the virus. A prerequisite for this is  
142 authenticity and accessibility of the AH epitope in the context of the ADDoCoV nanoparticle. To  
143 validate our design, we used Ribosome Display to select antibody binders from a naïve synthetic  
144 nanobody library, with ADDoCoV as an antigen (Fig. 2a). In Ribosome Display, a DNA library  
145 encoding for nanobodies is transcribed and translated *in vitro*<sup>31</sup>. In the library, the stop codons are  
146 deleted and replaced with a DNA sequence encoding an oligopeptide spacer. Thus, *in vitro*  
147 transcription and translation gives rise to ribosome nascent chain complexes (RNCs) coupling the  
148 genotype (mRNA) to the phenotype (nanobody), tethered to the ribosome. RNCs comprising specific  
149 nanobody binders are rapidly selected by panning on ADDoCoV immobilised on a surface. After  
150 washing away unbound RNCs, the remaining mRNA is recovered by dissociating the bound RNCs.  
151 Reverse transcription and PCR regenerates a DNA pool enriched for specific nanobody binders (Fig.  
152 2a). By ELISA, we identified nanobodies that bound ADDoCoV as well as SARS-CoV-2 S and  
153 RBD, but not bovine serum albumin (BSA), native ADDomer scaffold, and S lacking the AH epitope  
154 (Fig. 2b, Supplementary Table 2). A nanobody identified in this way, ADAH11, showed efficient

155 virus neutralisation in live SARS-CoV-2 infection assays using two different ACE2-expressing cell  
156 lines (Caco-2-ACE2 and VeroE6-TMPRSS2) (Fig. 2c).

157 ADAH11 was expressed and purified to homogeneity and tested for binding to highly  
158 purified ADDoCoV by SEC confirming complex formation (Supplementary Fig. 5). Purified  
159 ADDoCoV-ADAH11 complex was analyzed by cryo-EM (Fig. 2d-f, Supplementary Fig. 6,  
160 Supplementary Table 3). Comparison of reference-free 2D class averages of ADDoCoV-ADAH11 or  
161 ADDoCoV, respectively, clearly indicated additional density for the nanobody containing complex  
162 (Fig. 2d). The cryo-EM structure of the ADDoCoV-ADAH11 complex revealed nanobody binding to  
163 the crown domains comprising the AH epitope (Fig. 2e,f, Supplementary Fig. 6e). The arrangement  
164 of the pentons within the dodecahedron locates the AH epitopes in apparent triangles on the  
165 ADDoCoV surface. This is reflected by the triangular shape of the extra density stemming from  
166 nanobody binding (Fig. 2e). The limited resolution of the cryo-EM density in these more flexible  
167 outer regions only allowed rigid body docking of the nanobody, suggesting that ADAH11 is  
168 interacting with a central segment of the AH epitope in the protomer crown domain (Fig. 2f).  
169 Nanobody binding to cognate antigen is typically dictated by complementarity-determining region 3  
170 (CDR3). In ADAH11, CDR3 comprises an arginine residue, R105 (Fig. 2f, Supplementary Table 2).  
171 By using surface plasmon resonance (SPR) by Biacore, we characterised ADAH11 binding to the  
172 SARS-CoV-2 S RBDs of the original Wuhan virus, as well as to the currently dominating Variants  
173 of Concern (VOCs) Delta and Omicron (Fig. 2g). ADAH11 bound immobilised S RBD of Wuhan  
174 and Delta, both, with similar, low nanomolar affinity ( $K_D$  of 108 nM and 59 nM, respectively).  
175 Omicron S RBD, in contrast, was bound significantly less tightly ( $K_D$  of 2.4  $\mu$ M). Of note, ADAH11  
176 binding to Wuhan and Delta S would juxtapose R105 in CDR3 with a glutamine residue in the  
177 RBMs. In Omicron, in contrast, this glutamine is mutated to arginine (Fig. 2g). The resulting  
178 juxtaposition of two positively charged arginine residues in RBM and CDR3 could thus contribute to  
179 significantly reduced binding of Omicron S RBD by ADAH11.

180 To summarise, a nanobody specific for an epitope derived from the RBM in the SARS-CoV-  
181 2 RBD was selected by Ribosome Display. This *in vitro* generated nanobody bound ADDoCoV,  
182 cross-reacted with the RBM in SARS-CoV-2 S, and neutralised live SARS-CoV-2 in cell-based  
183 infection assays, validating the authenticity and accessibility of the RBM-derived AH epitope  
184 displayed on the ADDoCoV nanoparticle vaccine.

185

### 186 **ADDomer-based ultrahigh-affinity Gigabody displaying SARS-CoV-2 nanobody binders**

187 In adenovirus, the penton represents the base for attachment of the adenoviral fibre proteins that form  
188 characteristic protrusions at the vertices of the adenoviral capsid. The fibre adopts a trimer of three  
189 identical fibre proteins. Attachment to the penton base is mediated by a highly conserved, proline-  
190 and tyrosine-rich N-terminal fibre tail peptide present on each of the monomers (Supplementary  
191 Table 4). The fibre tail peptide binds to a tailormade fibre tail peptide-binding cleft on the penton  
192 base. In a previously reported crystal structure of an adenoviral penton bound to isolated fibre tail  
193 oligopeptides, all five binding clefts were occupied (Fig. 3a, Supplementary Fig. 8) <sup>35</sup>. In the  
194 adenovirus, binding of the trimeric fibre to the penton base will result in two of five clefts remaining  
195 unoccupied.

196 The nanobodies we selected by Ribosome Display neutralised live SARS-CoV-2, most likely  
197 by blocking interactions with the ACE2 receptor due to steric hindrance. The nanobodies we  
198 obtained in this way were characterised by binding affinities of about 100 nM to their target antigen  
199 (Fig. 2g, Supplementary Fig. 7). Multimerisation of a nanobody can result in much tighter binding  
200 by increased avidity. We set out to exploit the principles of adenoviral fibre attachment using  
201 nanobody ADAH11 as a starting point, with the aim of creating an ultra-high affinity superbinder,  
202 ‘Gigabody’, displaying multiple copies of ADAH11, with the potential to forestall SARS-CoV-2  
203 infection, which conceivably, could be utilised for passive immunisation.

204 We had designed ADDoCoV based on a penton base protomer derived from human  
205 adenovirus serotype Ad3, which can efficiently self-assemble into a dodecahedron <sup>28</sup>. For Gigabody,



206 we chose a different protomer, derived from chimpanzee adenovirus AdY25 to form the ADDomer  
207 (Supplementary Table 5). Using the adenovirus fibre as a blueprint, we designed a nanobody trimer  
208 by fusing a T4 phage derived trimerisation domain (T4 foldon) preceded by the AdY25 fibre tail, to  
209 the N-terminus of ADAH11 (Fig. 3b, Supplementary Table 6). Next, Gigabody was produced by  
210 mixing the trimers with AdY25-derived ADDomer, purified by SEC and dodecahedron formation  
211 confirmed by negative-stain EM (Supplementary Fig. 8). Due to the 3:5 symmetry mismatch of  
212 ADAH11 trimer and penton, the trimer structure cannot be resolved at high resolution by cryo-EM,  
213 and computational modeling was used to illustrate the geometry of the Gigabody nanoparticles (Fig.  
214 3c, Supplementary Fig. 9, Supplementary Movie 2). Fully occupied Gigabody presents 36 ADAH11  
215 nanobodies arranged in 12 trimers, which should substantially increase binding to the cognate AH  
216 epitope by increasing avidity. We tested Gigabody binding to SARS-CoV-2 Wuhan S RBD by SPR.  
217 As expected, binding improved substantially, from about 100 nM for monomeric ADAH11 to  
218 picomolar for the Gigabody, driven by very slow dissociation (Fig. 3d). Moreover, with monomeric  
219 ADAH11, we had observed a significant drop in binding affinity from Wuhan S RBD (100 nM) to  
220 Omicron S RBD (2.4  $\mu$ M) whereas Gigabody binding to Wuhan and Omicron was virtually  
221 identical, in the picomolar range (Fig. 3d). This indicates that Gigabody, by presenting multiple  
222 copies of ADAH11, can rescue the comparatively low, micromolar affinity binding by the nanobody  
223 to Omicron S RBD (Fig. 3d).

224 We tested the capacity of Gigabody to abrogate virion attachment to ACE2 expressing cells.  
225 We used synthetic minimal SARS-CoV-2 virions decorated with highly purified S glycoproteins  
226 (SARS-CoV-2 MiniVs) as a model system, affording complete control of experimental parameters  
227 <sup>36</sup>. We had used synthetic MiniVs previously to reveal fatty-acid coupled adaptive immunogenicity  
228 of SARS-CoV-2 <sup>36</sup>. SARS-CoV-2 MiniVs faithfully recapitulate viral attachment and can be studied  
229 in a regular laboratory setting (biosafety level 1), in contrast to live virus. We assessed competitive  
230 binding of Gigabody to MiniV-presented S in a serial dilution (Fig. 3e) and analysed attachment of  
231 SARS-CoV-2 MiniVs to ACE2-expressing A549 cells exposed to Gigabody by laser scanning

232 confocal microscopy (Fig. 3f). We observed quantitative inhibition of SARS-CoV-2 MiniV cell  
233 attachment at a Gigabody concentration of 1.6 nM (Fig. 3f). Previously, we had determined EC<sub>50</sub> of  
234 ADAH11 nanobody in terms of MiniV retention as 117 nM<sup>36</sup>. Gigabody EC<sub>50</sub> is 42 pM (Fig. 1e),  
235 which is 300-fold lower, closely mirroring the respective binding properties of single nanobody and  
236 Gigabody, respectively, in SPR measurements (Fig. 2g, Fig 3d). Due to the presence of multiple  
237 nanobody trimers bound to the pentons, Gigabody could in theory induce virion aggregation, similar  
238 to agglutination. We analysed the hydrodynamic size distribution of SARS-CoV-2 MiniVs by  
239 dynamic light scattering, confirming aggregation following Gigabody addition, with particle sizes  
240 increased to ~1000 nm from the diameter of a single virion (~100 nm) (Fig. 3g).

241 Taken together, we have mimicked the design of the adenoviral fibre, and its attachment  
242 mechanism in the adenovirus, to generate a Gigabody nanoparticle decorated with multiple copies of  
243 trimerised ADAH11. By avidity, Gigabody binds the cognate target in the RBM of SARS-CoV-2 S  
244 with greatly enhanced, picomolar affinity as compared to nanomolar binding by ADAH11 nanobody  
245 alone. Moreover, Gigabody binding to the RBMs in Wuhan S and Omicron S is virtually identical,  
246 while ADAH11 alone binds Omicron with significantly reduced affinity as compared to Wuhan,  
247 presumably due to the mutations accrued by Omicron in the RBM. Finally, Gigabody effectively  
248 abolishes attachment of SARS-CoV-2 MiniVs in cell-based assays and can mediate virion  
249 agglutination. Intriguingly, Gigabody thus may represent an attractive avenue for passive  
250 immunisation, based on the same nanoparticle scaffold concept, ADDomer, that we used for  
251 ADDoCoV, exploiting assembly principles of the adenovirus from which ADDomer is derived, and  
252 utilising antibody binders generated *in vitro* against ADDoCoV used as an antigen.

253

#### 254 **ADDoCoV immunisation experiments *in vivo* in mice**

255 Traditional routes of vaccine administration, such as intramuscular (IM), subcutaneous (SC) and  
256 intradermal vaccination, generally induce significant concentrations of antigen-specific IgG that are  
257 detectable in the recipient's serum. In the current study, we compared traditional IM or SC

258 vaccination with intranasal (IN) vaccination as this route may also induce strong systemic responses  
259 as well as significant levels of antigen-specific antibody detectable in mucosal secretions. We  
260 hypothesised that IN vaccination might be beneficial for a SARS-CoV-2 vaccine, as it could increase  
261 front-line mucosal defences against a pathogen that infects the respiratory tract and thus impact on  
262 viral transmission more effectively than the vaccines currently in use. Therefore, we tested the  
263 immunogenicity of ADDoCoV using a homologous prime-boost protocol (Fig. 4a). Specifically, we  
264 tested the immunogenicity of ADDoCoV in mice as compared to the naïve ADDomer nanoparticle  
265 as a control, when administered via SC, IM and IN routes. As shown (Fig. 4b-d), after the vaccine  
266 prime, the ADDoCoV formulation resulted in 100% seroconversion ( $n = 10$  mice/group) regardless  
267 of the route of administration. Elevated concentrations of anti-RBD specific serum immunoglobulin-  
268 G (IgG) were detected during study weeks 3, 6 and 9. When compared to baseline, anti-RBD IgG  
269 antibody titres in serum in week 9 after vaccination were significantly increased across all conditions  
270 (\*\*\*\* $p \leq 0.0005$ ) (Fig. 4e).

271         Given the important role that immunoglobulin A (IgA) plays in defence against mucosal  
272 pathogens<sup>37</sup>, we also measured the serum anti-RBD IgA response after ADDomer and ADDoCoV  
273 vaccination. Detectable anti-RBD IgA was also induced in serum (Fig. 4f-h), however the IgA  
274 response developed more slowly than the IgG response, with anti-RBD IgA antibody only being  
275 significantly elevated at week 9 in the SC and IN groups compared to the week 1 baseline control  
276 (Fig. 4i). Importantly, only the IN group showed 100% seroconversion after ADDoCoV  
277 administration, with the IN routes also resulting in the highest anti-RBD IgA response in serum.  
278 Taken together, these data show that the ADDoCoV vaccine is immunogenic and elicits antigen-  
279 specific antibody responses in the serum of vaccine recipients, irrespective of the route of  
280 administration. However, the magnitude, kinetics and isotype of the elicited antibody response are  
281 influenced by the route of administration.

282         To gain a more in-depth understanding of the elicited antibody response after SC, IM and IN  
283 vaccination with ADDoCoV at the end of the study, we collected nasal (Fig. 4j,k) and lung washes

284 (Fig. 4l,m) to quantify the anti-RBD IgG and IgA responses in mucosal secretions. As expected,  
285 systemic routes of vaccination failed to induce detectable anti-RBD IgG and IgA responses in nasal  
286 secretions with only the IN administration of ADDoCoV resulting in significantly elevated  
287 concentrations of IgG ( $*p \leq 0.05$ ) and IgA ( $***p \leq 0.0005$ ) compared to the ADDomer control vaccine.  
288 Interestingly, a distinct pattern of anti-RBD antibody induction was observed in lung washes. Here  
289 we found that significant levels of anti-RBD IgG was induced regardless of the route of vaccine  
290 administration. However, despite the IM, SC and IN groups all having significant levels of anti-RBD  
291 in lung washes, it should be noted that the IN group had the highest. Interestingly, only in the IN  
292 group were significant levels of anti-RBD IgA induced in lung washes (Fig. 4m). Taken together  
293 these results suggest that IN immunisation may induce mucosal antibody responses more efficiently  
294 than systemic routes of administration and support the use of this route of administration to enhance  
295 interruption of acquisition and onward transmission of infection.

296 Next, we sought to evaluate whether the antibodies induced by ADDoCoV vaccination were  
297 cross-reactive against a range of clinically relevant SARS-CoV-2 variants (Wuhan, Alpha, Beta,  
298 Delta, and Omicron) which would be important for broad protection, given the rapid and continuing  
299 evolution and diversification of SARS-CoV-2 in the human population. IgG antibodies induced  
300 following both IM and IN administration of the vaccine bound all SARS-CoV-2 S RBDs tested, with  
301 close to identical binding observed to Wuhan, Alpha and Delta RBDs, and reduced binding observed  
302 for Beta and Omicron RBDs (Fig. 4n,o). Of note, a reduction in binding to Omicron RBD, as  
303 compared to Wuhan and Delta RBDs, was also observed for ADAH11, the nanobody generated by  
304 Ribosome Display (Fig. 2g), suggesting that our *in vitro* selection may reproduce some of the  
305 antibody binding characteristics likewise occurring *in vivo*.

306 We showed that the ADDoCoV vaccine is immunogenic and induces antibodies in serum and  
307 mucosal secretions which are cross reactive against diverse SARS-CoV-2 S protein variant RBDs.  
308 Next, we used serum IgGs to perform a surrogate virus neutralisation assay (sVNT)<sup>38</sup>, based on  
309 competition with Wuhan RBD bound to immobilised ACE2. We observed moderate neutralising

310 activity in our tests (Fig. 4p). Antibody-mediated neutralisation is thought to be important in  
311 protection against infection by SARS-CoV-2<sup>39</sup>. At the same time, absence of strong neutralisation  
312 does not equate lack of protection by serum antibodies, as even entirely non-neutralising antibodies,  
313 which bind target proteins in pathogens specifically, can confer strong protection through antibody-  
314 dependent cellular functions<sup>40-42</sup>. We note that our *in vitro* generated nanobody binder, ADAH11,  
315 showed strong viral neutralisation (Fig. 2c). The serum antibodies, whilst specifically binding S  
316 RBM, may be characterised by moderate binding affinity, restricting their performance in the sVNT  
317 assay. It is conceivable that iterative adjustment and refinement of the vaccine design (Fig. 5), for  
318 instance by incorporating additional epitopes, could result in stronger binding and more efficient  
319 neutralisation by the antibodies generated.

320

## 321 **Discussion**

322 In summary, we developed ADDoCoV, a thermostable, self-assembling, self-adjuvanting multi-  
323 epitope display nanoparticle vaccine candidate against SARS-CoV-2, the causative agent of COVID-  
324 19 utilizing an efficient and rapid validation pipeline (Fig. 5). Our pipeline combines synthetic,  
325 structural and computational methods for epitope selection and vaccine candidate design with *in*  
326 *vitro* selection of neutralising nanobodies to confirm authenticity and accessibility of the epitope  
327 displayed, followed by *in vivo* immunisation studies in mice to characterise the immune response and  
328 how this is influenced by route of administration. We note that our *in vitro* selection by Ribosome  
329 Display generated nanobody binders that exhibited properties similar to the antibodies in the sera of  
330 immunised mice. This point is relevant in the context of the principle of 3Rs (reduce, replace, refine)  
331 to limit animal use for biomedical research, here for prescreening suitable vaccine candidates with  
332 the desired properties regarding the antigen displayed. Our mouse experiments elucidated nasal  
333 administration as a viable route for ADDoCoV vaccination, eliciting specific serum IgG and mucosal  
334 IgA responses *in vivo*. Moreover, making use of the neutralising nanobodies we selected *in vitro*, we  
335 created Gigabody, a novel ‘superbinder’ nanoparticle exploiting the same adenovirus-derived

336 dodecamer scaffold concept that we used for ADDoCoV. Gigabody displays multiple trimers of a  
337 neutralising nanobody, effectively blocks virion attachment to ACE2 expressing cells *in vitro* and  
338 could potentially be administered similar to ADDoCoV via the nasal route, for passive  
339 immunisation. Because we used ADDomer-forming protomers of different origin (human Ad3  
340 serotype and chimpanzee AdY25) as a scaffold for the ADDoCoV vaccine and Gigabody  
341 superbinder respectively, it is conceivable to deploy both vaccine and superbinder for active and  
342 passive immunisation in a given treatment regimen, circumventing potential pre-immunity issues. In  
343 this context it is noteworthy that several adenovirus serotypes have been identified comprising  
344 penton base proteins that can adopt dodecahedrons and could be used as scaffolds<sup>29</sup>.

345 In our mouse immunisation experiments, administration of ADDoCoV was sufficient to  
346 induce serum anti-RBD IgG production by subcutaneous, intramuscular, and intranasal routes,  
347 demonstrating that ADDoCoV is capable of inducing systemic immune responses to the relevant  
348 target. Since the ADDomer has been shown to self-adjuvant<sup>28</sup>, adjuvant was not included in our  
349 experiments. Serum anti-RBD IgG production was detectable at week 3 after a single dose and rose  
350 further following boosting at weeks 3 and 9. In all ADDoCoV treatment groups, significantly  
351 increased concentration of serum anti-RBD antibodies was detectable at week 9 compared to  
352 treatment-naïve animals at baseline.

353 Analysis of anti-RBD IgA responses at each time point revealed that protocol design, time  
354 and route of administration were important determinants of IgA induction. Serum anti-RBD IgA was  
355 detectable in peripheral blood samples only at week 9, following a complete prime-boost-boost  
356 protocol, showing a difference in seroconversion between IgG and IgA. Our results are consistent  
357 with maturation of the immune response following initial prime and subsequent boost treatments.  
358 Significant increases in serum anti-RBD IgA was observed only following subcutaneous or  
359 intranasal administration, while no significant increase in IgA production above baseline (treatment  
360 naïve) levels was detected in the intramuscular treatment group. This is interesting given that  
361 mucosal immunity is thought to be a critical aspect of SARS-CoV-2 infection<sup>43</sup>, and supports what

362 has been shown with other vaccines, that the recruitment of the appropriate physiological, e.g.  
363 mucosal, responses requires appropriate delivery of vaccine to relevant tissues.

364 The prevalence of antigen specific (anti-RBD) local/mucosal antibody production was  
365 assessed in nasal washes and bronchoalveolar lavage samples collected at week 9. Detection of  
366 vaccine induced local nasal IgG and IgA was limited to mice treated via intranasal ADDoCoV  
367 administration, whereas treatment via subcutaneous or intramuscular routes was inefficient in the  
368 generation of nasal mucosal antibody, as no increase in anti-RBD IgG or IgA was detectable above  
369 control levels. In contrast, lung mucosal IgG production was not dependent on the route of vaccine  
370 administration and was detected in ADDoCoV treated mice via all treatment routes. Induction of  
371 lung mucosal anti-RBD IgA production remained limited by the route of vaccine delivery, and was  
372 only detected in mice that received intranasal ADDoCoV administration. This is noteworthy as it  
373 further demonstrates specificity of induced mucosal responses according to route of administration,  
374 which was suggested by the presence of IgA in the serum of mice only after intranasal treatment. IgA  
375 is known to play a crucial role in the immune defense of mucosal surfaces, the first point of entry of  
376 SARS-CoV-2<sup>44</sup>.

377 Our current ADDoCoV vaccine design comprises 60 copies of the antigenic epitope AH,  
378 derived from the SARS-CoV-2 S RBM. The rationale for our design was to elicit an immune  
379 response that results in antibodies binding the RBM, sterically obstructing ACE2 binding. The  
380 SARS-CoV-2 neutralising nanobodies we selected *in vitro* by Ribosome Display compellingly  
381 validated our design, which was subsequently further underscored by the generation of anti-RBD  
382 antibodies, IgG and IgA, in vaccinated mice. Our synthetic ADDomer scaffold comprises three  
383 insertion sites per protomer<sup>28</sup>, and only one is currently occupied by AH. Cellular immunity  
384 mediated by T cells is known to play an important role in the protection against viral infection,  
385 mediating effective viral clearance, elimination of virus-infected cells, and long-term disease  
386 protection. ADDomer was shown to drain to lymph nodes and is efficiently taken up by antigen  
387 presenting cells<sup>28</sup>. Successful presentation of T cell epitopes, in addition to B cell epitopes, by



388 ADDomer has been demonstrated recently for Type O foot-and-mouth disease virus, resulting in  
389 protective responses against the viral pathogen <sup>45</sup>. A range of T cell epitopes in the SARS-CoV-2  
390 proteome have been identified. It is likely that by expanding our ADDoCoV design to include  
391 validated SARS-CoV-2 T epitopes in the currently unoccupied insertion sites in the ADDomer  
392 scaffold, a T cell response can also be activated against SARS-CoV-2. Emerging SARS-CoV-2  
393 VOCs, in particular Omicron, are characterised by multiple mutations, increasingly evading existing  
394 antibody responses, requiring updated versions of current vaccines to confer immunity. The ease of  
395 epitope insertion, and epitope alteration, on the genetic level renders the ADDomer scaffold  
396 particularly attractive for rapid, rolling update. We note that insertion of strings comprising several  
397 immunogenic epitopes in a row has been demonstrated for ADDomer <sup>28</sup>. We propose rapidly updated  
398 ADDoCoV nanoparticles, comprising strings of the respective B and T epitopes, as attractive  
399 candidates for recurring vaccination against SARS-CoV-2 VOCs. Again, to avoid pre-immunity  
400 issues, scaffolds of different origin could be used for booster vaccinations.

401         Affordable production is a key prerequisite for broad vaccine distribution in resource-limited  
402 settings. Other nanoparticle-based SARS-CoV-2 vaccine candidates are often made up of one or  
403 several different S proteins, or their RBDs, which are coupled to nanoparticle scaffolds <sup>46-48</sup>. For  
404 instance, a SARS-CoV-2 mosaic vaccine comprised 8 different S RBDs coupled to a separate  
405 nanoparticle <sup>46</sup>. A different nanoparticle vaccine candidate displays S on a nanoparticle scaffold  
406 which itself is made up of different components, each produced in a different heterologous system <sup>47</sup>.  
407 These nanoparticle vaccines share in common that all components, S, RBD and nanoparticles, need  
408 to be produced and purified separately, then combined and repurified, multiplying manufacturing  
409 runs and associated costs. In contrast, ADDoCoV relies on genetically encoded multiepitope display  
410 by a single, one-component particle, requiring one production run only using established  
411 manufacturing technology, significantly reducing costs and maintaining thermostability of the  
412 particle.



413 We utilised our pipeline to address SARS-CoV-2, but our approach can be applied to any  
414 other infectious disease-causing pathogen for which immunogenic epitopes are known to exist. We  
415 anticipate thermostable and affordable ADDomer-based nanoparticle therapeutics, both, vaccines for  
416 active, and Gigabodies for passive immunisation, designed, produced and validated as described here  
417 for ADDoCoV, to tackle many human and animal infectious diseases including pandemic outbreaks,  
418 present and future.

419

420

421

## 422 **Materials and Methods**

### 423 **Protein production**

424 *ADDoCoV preparation.* ADDoCoV was designed during the early pandemic before SARS-CoV-2 S  
425 structures became available, based on sequence comparison of the RBDs of SARS-CoV S, MERS-  
426 CoV S and SARS-CoV-2 S, and the structure of SARS-CoV bound to ACE2 receptor or neutralising  
427 antibodies, respectively <sup>49-52</sup>. Variations of the oligopeptide sequence corresponding to the ACE2  
428 receptor binding motif (RBM) were then inserted into the ADDomer scaffold as described previously  
429 <sup>28</sup> and expressions carried out using the MultiBac baculovirus expression system following  
430 established protocols <sup>53-55</sup>. ADDoCoV, the candidate here described comprises a 33 amino acid  
431 sequence (AH epitope) in the VL insertion site (Fig. 1a, Supplementary Table 1).

432 ADDoCoV purification was adapted a from a previously established protocol <sup>56</sup>. Briefly,  
433 pellets were resuspended in Resuspension Buffer (50 mM Tris pH 7.5, 150 mM NaCl, 2 mM MgCl<sub>2</sub>  
434 Buffer, 1 ml per 2.5x10<sup>7</sup> cells) supplemented by EDTA-free complete protease inhibitor (Roche).  
435 Lysate was prepared by three cycles of freeze-thawing, cleared by centrifugation (40,000g, 30 min),  
436 supplemented with Benzonase (Sigma-Aldrich) and incubated on ice for 2 hours. Precipitate was  
437 removed by centrifugation (4000g, 15 min), the supernatant passed through a 0.45 µm filter and  
438 subjected to size exclusion chromatography (SEC) using a XK 26/100 column (GE Healthcare).

439 Fractions containing ADDoCoV were pooled and further purified by ion exchange chromatography  
440 (IEX) using a 5 ml Bio-Scale Mini Macro Prep High Q (Bio-Rad) equilibrated in Buffer A (50 mM  
441 Tris pH 7.5, 150 mM NaCl) and a linear salt gradient from 0.15 M to 1 M NaCl. Highly purified  
442 ADDoCoV eluted at ~300 mM to 400 mM NaCl. Fractions were pooled and stored at ambient  
443 temperature or refrigerated (4°C). For animal studies, ADDoCoV particles were filtered through a  
444 0.22 µm filter and further purified utilising Detoxi-Gel (ThermoFischer Scientific) to remove  
445 endotoxins and dialysed against PBS.

446 *Receptor-Binding Domains (RBDs)*. Biotinylated SARS-CoV-2 RBDs of Wuhan, Alpha,  
447 Beta, Delta and Omicron were expressed and purified as described <sup>57</sup>.

448 *ADAH11 expression and purification*. A synthetic gene (Genscript) encoding for ADAH11  
449 was inserted into plasmid pHEN6 <sup>58</sup> resulting in construct pHEN6-ADAH11 comprising a PelB  
450 secretion signal at the N-terminus and a hexa-histidine and triple-FLAG tag on the C-terminus.  
451 Nanobody was expressed in *Escherichia coli* (*E. coli*) TG1 cells cultured in 2xYT media, induced  
452 with 1mM Isopropylthio-β-galactoside (IPTG) overnight (~16 hours) at 30°C, harvested by  
453 centrifugation and pellets stored at -80°C. Cell pellets were resuspended in ice cold TES (50 mM  
454 TRIS pH 8.0, 20% w/v sucrose, 1 mM EDTA) and incubated for 1h at 4°C. Next, Shock Buffer  
455 (20 mM Tris pH 8.0, 5 mM MgCl<sub>2</sub>) was added followed by incubation for 1h at 4°C. Supernatant  
456 was cleared by centrifugation, applied to 1 ml HisPur Ni-NTA resin (ThermoFisher Scientific) and  
457 incubated for 1h at 4°C with agitation. After washing with Wash Buffer (50 mM HEPES pH 8.0, 200  
458 mM KCl, 10 mM Imidazole), ADAH11 was eluted with Elution Buffer (150 mM imidazole 50 mM  
459 HEPES pH 8.0, 200 mM KCl). Fractions containing ADAH11 protein were pooled, dialysed into  
460 PBS and further purified by SEC using a S200 10/30 GL column (Cytiva) equilibrated in PBS.  
461 Eluted ADAH11 was concentrated to 1 mg/ml, and stored at -80°C.

462 *Gigabody preparation*. ADDomer derived from chimpanzee adenovirus AdY25 comprising  
463 an A57S mutation (Supplementary Table 1) was expressed and purified as described above for  
464 ADDoCoV. Following SEC and IEX, samples were sterile filtered, flash frozen in liquid nitrogen

465 and stored at  $-80^{\circ}\text{C}$ . The integrity of the final sample was confirmed using both reducing SDS-PAGE  
466 and negative stain EM.

467 A codon optimised synthetic DNA encoding fibre tail peptide (Supplementary Table 5), T4-  
468 foldon trimerisation domain and ADAH11 spaced by glycine-serine linker sequences  
469 (Supplementary Table 6) was inserted into the pHEN6 plasmid (Genscript), expressed in T7 Express  
470 *E. coli* cells (New England Biolabs) cultured in Terrific broth (TB) medium and induced with 1mM  
471 IPTG for overnight expression at  $16^{\circ}\text{C}$ . Cells were harvested by centrifugation (4,000g for 10 min),  
472 resuspended in Lysis Buffer (50mM Tris-HCl pH 8, 300 mM NaCl, 10 mM Imidazole, 0.5mg/ml  
473 Lysozyme), frozen at  $-20^{\circ}\text{C}$  and thawed at  $37^{\circ}\text{C}$  for 10 min, followed by DNase treatment at  $4^{\circ}\text{C}$  (15  
474 min). DNase treated sample was sonicated at 50% amplitude 4 times for 30 seconds, Pulse 1s/1s  
475 using Vibracell VC 750 (Sonics and Materials) and clarified by centrifugation (12,000g for 15 min).  
476 Cleared supernatant was loaded onto a 5ml HisTrap FF crude Ni-NTA affinity column (Cytiva),  
477 washed with Wash Buffer (50 mM Tris-HCl pH 8, 300 mM NaCl, 50 mM Imidazole), and nanobody  
478 trimers eluted with Elution Buffer (50 mM Tris-HCl pH 8, 300 mM NaCl, 250 mM Imidazole).  
479 Elution fractions were pooled and concentrated to 500  $\mu\text{l}$  using a 10 kDa MWCO Amicon centrifugal  
480 filter unit (EMD Millipore), and further purified by SEC using a Superose 6 HR 10/30 column  
481 (Cytiva) equilibrated with PBS. Peak fractions were pooled, aliquoted and stored at  $4^{\circ}\text{C}$ .

482 Gigabody was assembled by mixing purified ADAH11-Trimer and AdY25 A61S ADDomer  
483 in PBS at a molar ratio of 1:1.2 pentons to ADAH11-Trimer. After 1-hour incubation rotating at  $4^{\circ}\text{C}$ ,  
484 the mixture was subjected to SEC on a Superdex 200 10/300 GL column (GE Healthcare)  
485 equilibrated in PBS. Peak fractions containing Gigabody were pooled, concentrated using a 100 kDa  
486 MWCO Amicon centrifugal filter unit (EMD Millipore) and used fresh, or flash-frozen in liquid  $\text{N}_2$   
487 for storage at  $-80^{\circ}\text{C}$ .

488

#### 489 **Thermostability measurements**

490 Thermal shift experiments were performed using a ThermoFluor assay as described previously<sup>28</sup>.

491

492 **Negative-stain sample preparation and electron microscopy**

493 *ADDoCoV*. 4  $\mu$ l of 0.1 mg/ml ADDoCoV protein sample dialyzed into 25 mM HEPES pH 7.5, 150  
494 mM NaCl, 2 mM EDTA was applied onto a freshly glow discharged (1 min at 10 mA) CF300-Cu  
495 grid (Electron Microscopy Sciences), incubated for 1 min, and manually blotted. 4  $\mu$ L of 3% Uranyl  
496 Acetate was applied onto the same grid and incubated for 1 min before the solution was blotted off.  
497 Images were acquired at a nominal magnification of 49,000x on a FEI Tecnai 12 120 kV BioTwin  
498 Spirit microscope equipped with an an Eagle 4k x 4k CCD camera.

499 *ADDoCoV-ADAH11 complex*. 5  $\mu$ l of 0.1 mg/ml ADDoCoV-ADAH11 complex sample was  
500 prepared as above. Images were recorded at 62,000x magnification corresponding to a pixel size of  
501 1.63  $\text{\AA}$ /pix. A total of 5,025 particles from 498 images were picked and reference free two-  
502 dimensional classification was performed leading to 1,396 particles included in final 2D class  
503 averages (Supplementary Fig. 6).

504

505 **Cryo-EM sample preparation and data collection**

506 *ADDoCoV*. 4  $\mu$ l purified ADDoCoV (0.54 mg/ml) was applied to glow-discharged holey Quantifoil  
507 R 1.2/1.3 holey carbon grids (Agar Scientific), blotted for 2 seconds at 100% relative humidity and  
508 4°C inside a Vitrobot Mark III, before plunge-freezing in 37% ethane-propane at liquid nitrogen  
509 temperature. Cryo-EM data were collected at 200 kV with a FEI Talos Arctica microscope equipped  
510 with a Gatan K2 direct electron detector and an energy filter at 20 eV slit width, using automated  
511 acquisition software (EPU). A total of 1375 dose-fractionated movies each containing 40 frames (0.2  
512 s per frame) with an accumulated total dose of 44  $e^-/\text{\AA}^2$  were recorded in counted super-resolution  
513 mode at a nominal magnification of 130,000x corresponding to a physical pixel size of 1.05  $\text{\AA}$  and a  
514 virtual pixel size of 0.525  $\text{\AA}$  using a defocus range of -0.7 to -2.2  $\mu$ m (Supplementary Figs 2,3,  
515 Supplementary Table 2).

516 *ADDoCoV-ADAH11 complex*. 3  $\mu$ l of 1.2 mg/ml ADDoCoV-ADAH11 complex was loaded

517 onto a glow discharged Quantifoil R1.2/1.3 holey carbon grid (Agar Scientific). The sample was  
518 incubated for 30 s at 90 % relative humidity and 16°C inside Leica EM ACE 600 (Leica EM GP2  
519 plunge freezer), blotted for 1.2 s and vitrified in liquid ethane at liquid nitrogen temperature. Data  
520 were acquired on a FEI Talos Arctica as described above. Data were collected in counted super-  
521 resolution mode at a nominal magnification of 130,000x with a physical pixel size of 1.05 Å/pix and  
522 a virtual pixel size of 0.525 Å/pix. The total dose of 55.6 e/Å<sup>2</sup>. Each movie was fractionated in 45  
523 frames of 200 ms. 11,800 micrographs were collected with a defocus range comprised between -0.8  
524 and -2.0 μm.

525

### 526 **Cryo-EM data processing**

527 *ADDoCoV*. Image processing was performed with the RELION 3.1 software package <sup>59</sup>. The  
528 micrographs were motion corrected using MotionCor2 <sup>60</sup> and contrast transfer function (CTF)  
529 information determined using getffind4.1 <sup>61</sup>. 1375 micrographs with CTF rings extending beyond 4 Å  
530 were selected for further processing. 96,456 particles were boxed using RELION auto-picking  
531 software. 2D classification (Supplementary Fig. 2) and 3D classification with imposed icosahedral  
532 symmetry was performed, followed by initial 3D-autorefinement. Further rounds of 3D-  
533 classification/refinement were carried out on 32,227 polished particles after CTF refinement and  
534 spherical aberration correction before using post-processing for masking and automatic B-factor  
535 sharpening. The resolution of the final map was determined to be 2.36 Å based on the Fourier Shell  
536 Correlation (FSC) = 0.143 criterion (Supplementary Fig. 3). Local resolution was calculated using  
537 local resolution estimation programme in RELION (Supplementary Fig. 3b). 3D classification was  
538 performed using public cloud resources provided by Oracle Cloud Infrastructure as described  
539 previously <sup>28</sup>.

540 *ADDoCoV-ADAH11 complex*. 11,283 dose-fractionated movies were image processed as  
541 described above. 68,258 particles were automatically picked using Relion 4.0 <sup>62</sup>. After three rounds  
542 of 2D classification, a total of 46,223 particles were selected for further 3D classification. The initial

543 3D model was filtered to 60 Å during 3D classification using 8 classes. The best class of 13,950  
544 particles was selected for the following 3D-autorefinement leading to a reconstruction of ~4.35 Å  
545 resolution. Subsequently, the maps were subjected to local defocus correction and Bayesian particle  
546 polishing in Relion 4.0. Global resolution and B-factor ( $-79.66 \text{ \AA}^2$ ) of the maps were estimated by  
547 applying a soft mask around the protein density using the gold-standard FSC criterion 0.143,  
548 resulting in an overall resolution of 4.06 Å (Supplementary Fig. 6). Local resolution maps were  
549 generated using Relion 4.0. The refined particles stack was expanded 60-fold according to  
550 icosahedral symmetry. The symmetry expanded particle stack was then used as input for the masked  
551 3D classification with the focus mask corresponding to one penton base protein and the ADAH-11  
552 region created in UCSF Chimera<sup>63</sup>. The masked 3D classification was performed with 8 classes  
553 resulting three good classes with densities for ADAH11 and penton base protein (Fig. 2e.f,  
554 Supplementary Fig. 6).

555

#### 556 **Cryo-EM model building and analysis**

557 Homology modelling was performed using iTasser<sup>64</sup> starting from the human ADDomer structure  
558 (PDB ID 6HCR)<sup>28</sup>. Using COOT<sup>65</sup>, the model was fitted manually into the EM map, followed by  
559 iterative positional and B-factor refinement using Phenix Real-Space software<sup>66</sup>. After adjustments  
560 in COOT the model was evaluated using Molprobit<sup>67</sup>.

561

#### 562 ***In vitro* selection of specific nanobodies by Ribosome Display**

563 Ribosome display *in vitro* selection using a synthetic nanobody library was performed against  
564 ADDoCoV (comprising the SARS-CoV-2 S RBM AH epitope) as described<sup>31</sup>. After five cycles of  
565 ribosome display against ADDoCoV immobilised on 96-well microtiter plates, the DNA pool was  
566 cloned into pHEN6. Individual colonies were picked, and nanobodies expressed in *E. coli* TG1  
567 (Agilent Technologies) in dYT medium at 30°C overnight after induction with 1 mM IPTG.  
568 Nanobodies binding ADDoCoV, the SARS-CoV-2 RBD and S, but not ADDomer alone or a mutant

569 S devoid of AH (Spike $\Delta$ AH), were identified by ELISA and then sequenced (Supplementary Table  
570 3).

571

## 572 **Surface plasmon resonance (SPR) experiments**

573 *ADAH11 nanobody binding to SARS-CoV-2 RBDs.* Interaction experiments using surface plasmon  
574 resonance (SPR) of ADAH11 nanobody monomer and different RBDs were carried out with a  
575 Biacore T200 system (GE Healthcare) according to the manufacturer's protocols and  
576 recommendations. Briefly, biotinylated RBD proteins were immobilised on streptavidin-coated SA  
577 sensor chips at ~3845 response units (RU) for Wuhan RBD and ~2500 RU for Delta and Omicron  
578 RBD. Binders were diluted to the concentrations indicated (Fig. 2g) and passed over immobilised  
579 RBDs at a flow rate of 30  $\mu$ l/minute. The Running Buffer for all SPR measurements was PBS. The  
580 sensorgrams were analyzed using the Biacore Evaluation Software (GE Healthcare) and  $k_{on}$ ,  $k_{off}$  and  
581  $K_D$  values were determined using a two state reaction binding model. All experiments were  
582 performed in triplicates.

583 *Gigabody binding to Wuhan RBD.* Purified, biotinylated Wuhan RBD ligand was  
584 immobilised on a streptavidin-coated (SA) sensor chip (GE Healthcare) at 2453 RU. For all  
585 interaction measurements, the analyte was injected at a flow rate of 50  $\mu$ l/min for 120s using PBS as  
586 the Running Buffer. Dissociation was performed for 600s. Gigabody, and AdY25 ADDomer as a  
587 negative control, were serially diluted and injected at concentrations of 0.5nM, 1.0nM, 1.5nM and  
588 2.0nM. The chip was regenerated using 2 injections of 10mM glycine pH 2.6. All measurements  
589 were performed in triplicates. Final sensorgrams were obtained by subtracting the control  
590 sensorgrams from the corresponding Gigabody sensorgrams accounting for non-specific binding to  
591 the sensor chip. Fitting with Biacore Evaluation Software (GE Healthcare) indicated picomolar  
592 binding ( $K_D=30\pm 20$ pM) dictated by very slow dissociation kinetics.

593 *Gigabody binding to Omicron RBD.* Purified, biotinylated Omicron RBD ligand was  
594 immobilised on a SA sensor chip (GE Healthcare) at 3622 RUs. Injection, dissociation and



595 regeneration were performed as above, for Gigabody serial diluted at concentrations of 1.0nM,  
596 1.5nM, 2.0nM and 2.5nM. Sensorgrams were analyzed with the Biacore Evaluation Software, again  
597 indicating picomolar binding ( $K_D=10\pm 3\text{pM}$ ) with very slow dissociation kinetics, similar to Wuhan  
598 RBD.

599

## 600 **Molecular Dynamics simulations**

601 *Construction of a complete ADDoCoV model using Rosetta and MD.* The input model was based on  
602 the cryo-EM structure combined with the AH-epitope sequence (Fig. 1d, Supplementary Table S1)  
603 added manually adopting a structure derived from the ACE2 receptor in complex with the RBD of  
604 the S protein (PDB ID 7C8D)<sup>68</sup>. The RGD loop, unresolved in the cryo-EM density, was  
605 reconstructed using Rosetta<sup>69-73</sup>. Symmetrical pentamer models were generated with Rosetta  
606 SymDock<sup>71,72</sup>, and the introduced 5-fold symmetry was maintained during all following steps.  
607 Missing loops were reconstructed using Rosetta Remodel<sup>69,73</sup>. Models were relaxed using Rosetta  
608 Relax<sup>70</sup>, and subjected to MD simulations with GROMACS 2019<sup>74</sup>. The ADDoCoV structure was  
609 parametrised with the gromos54a7 forcefield in a cubic box with simple point charge water and  
610 sodium ions to neutralize the net charge. MD comprised 5 replicates of 100 ps of NVT followed by  
611 67 ns of NPT simulations. Trajectories were analyzed with CPPTRAJ<sup>75</sup>. All analyses were based on  
612 C $\alpha$  positions if not stated otherwise. The first 10 ns of each production MD run were excluded from  
613 all analyses to allow time for system equilibration. The conformational landscape of the AH epitope  
614 was analyzed by principal component analysis (mdtraj<sup>76</sup> and sklearn<sup>77</sup>) and cluster analyses  
615 (cpptraj, kmeans algorithm) based on the same cartesian space.

616 *Construction of a Gigabody model using Rosetta and MD.* Missing loops in the ADDomer  
617 model, sequence adjusted for the AdY25 penton base protomer (Supplementary Table 1), were  
618 constructed using Rosetta SymDock<sup>71,72</sup>, Remodel<sup>69,73</sup> and Relax<sup>70</sup> as described for the ADDoCoV  
619 model. The trimeric ADAH11 nanobody fibre tag structure was modeled based on the bacteriophage  
620 T4 fibrin derived trimeric foldon structure (PDBID: 4NCV)<sup>78</sup>. The structures of the fibre tail



621 peptide fused to the N-terminus of the foldon, and ADAH11 nanobody fused to the C-terminus, were  
622 predicted with trRosetta<sup>79</sup>. Two amino acids of the foldon were included during the prediction with  
623 trRosetta at the C-terminus of the fibre tail peptide and the N-terminus of the nanobody, respectively  
624 (Supplementary Fig. 8). The fibre tail peptides and nanobodies were aligned to the trimeric foldon  
625 using these overlapping residues. The complete ADAH11-Trimer structure was subsequently relaxed  
626 with Amber<sup>75</sup> using the ff14SB forcefield and no solvent in three consecutive minimisations with  
627 1000 cycles with positional restraints on all atoms of 10, 1, and 0 kcal/mol/Å<sup>2</sup>.

628         Next, the structure was further relaxed with Rosetta<sup>70</sup> using the MonomerRelax2019 script  
629 and the 10 lowest energy structures were placed manually in PyMol on top of the AdY25 ADDomer  
630 A57S model guided by the Ad5 penton base fibre tail peptide complex (PDB ID 1X9T)<sup>35</sup>.  
631 Subsequently, Amber<sup>75</sup> was used to relax the fibre tail peptide to the position observed in the  
632 experimental structure (PDB ID 1X9T)<sup>35</sup>. 50 ns MD simulations were then performed with Amber.  
633 The protein was parametrised with the united-atom forcefield ff03u<sup>80</sup>. The ADDomer-fibre tail  
634 peptide complex was relaxed with increasing positional restraints (1000 steps, ntmin = 3,  
635 restraint\_wt = 0.1, 0.2, 0.5, 1, 2, 5, and 10) on the ADDomer and the fibre tail peptides to generate a  
636 complex in the experimentally-observed conformation (PDB ID 1X9T)<sup>35</sup>.

637         Two additional minimisation steps were performed, the first without positional restraints and  
638 the second with implicit Born solvation model (IGB=1)<sup>81</sup>. After an initial heating step (0.05 ns from  
639 0.1 to 300 K), 50 ns MD simulations were performed with 2 fps timestep using implicit solvation and  
640 Langevin dynamics (ntt=3) for each of the 20 starting structures (10 Rosetta models \* 2  
641 conformations). Four runs with the three fibre tail peptides in proximity and three runs with two  
642 peptides in proximity were unstable and discarded. To illustrate the full scale of the Gigabody (Fig.  
643 3c, Supplementary Fig. 8), the modeled pentamers from these simulations were aligned with the  
644 pentamers in the ADDomer cryo-EM structure (PDB ID 6HCR)<sup>28</sup>.

645

646 **SARS-CoV-2 MiniV preparation**

647 Artificial minimal SARS-CoV-2 virions (MiniVs) were assembled from small unilamellar vesicles  
648 (SUVs) as described previously<sup>36</sup>. Briefly, SUVs containing NTA(Ni<sup>2+</sup>) and Rhodamine B-  
649 functionalised membranes were coupled to recombinant Wuhan SARS-CoV2 S ectodomains bearing  
650 an oligohistidine tag<sup>34</sup>. SUVs were prepared by membrane extrusion to obtain a monodisperse  
651 vesicle population with a mean diameter of 100 nm from a lipid solution of 45 mol% DOPC,  
652 21 mol% DOPE, 3 mol% DOPS, 12 mol% DOPI, 14 mol% cholesterol, 3 mol% SM, 1 mol%  
653 DGS-NTA(Ni<sup>2+</sup>) and 1 mol% Rhodamine B-PE (all lipids obtained from Avanti Polar Lipids).

654 MiniV size distribution was measured by dynamic light scattering with a Malvern Zetasizer  
655 Nano ZS system at a total lipid concentration of 100 μM in PBS. Temperature equilibration time  
656 was set to 300 s at 25 °C, followed by three repeated measurements for each sample at a scattering  
657 angle of 173° using the built-in automatic run-number selection. The material refractive index was  
658 set to 1.4233 and solvent properties to  $\eta = 0.8882$ ,  $n = 1.33$  and  $\epsilon = 79.0$ . For assessment of  
659 Gigabody-mediated MiniV clustering, the MiniV solution was preincubated with 1.5 nM Gigabody  
660 for 30 min in the dark at 4°C before measurement.

661 For confocal microscopy observation of MiniV-cell attachment after 2.5 hours of incubation  
662 under control conditions, or with addition of 500 nM nanobodies or 1.6 nM Gigabody, respectively,  
663 A549 cells stably expressing ACE2<sup>82</sup> were stained with CellTracker Green CMFDA dye  
664 (Invitrogen, USA) according to the manufacturer's recommendations. Nuclei were stained with 10  
665 μM Hoechst33342 (Sigma Aldrich). Laser scanning confocal microscopy was performed with a  
666 LSM 800 (Carl Zeiss AG). Images were acquired with a ×63 immersion oil objective  
667 (Plan-Apochromat ×63/1.40 Oil DIC, Carl Zeiss AG). Analysis was performed with ImageJ (NIH)  
668 and adjustments to image brightness and contrast, as well as background corrections, were always  
669 performed on the whole image and special care was taken not to obscure or eliminate any  
670 information from the original image.

671

672 **SARS-CoV-2 MiniV retention assays**

673 Retention assays were performed as described previously<sup>36</sup> using human ACE2 expressing A549  
674 cells. Briefly, MiniVs were incubated with A549 cells at a final lipid concentration of 10  $\mu$ M in flat  
675 bottom 96 well plates and in low serum containing culture medium (DMEM supplemented without  
676 phenol red, 4.5  $\square$ g/l glucose, 1% L-glutamine, 1% penicillin/streptomycin, 0.01  $\square$ mg/ml recombinant  
677 human insulin, and 0.5% fetal bovine serum). After 2.5 hours, MiniV Rhodamine B fluorescence  
678 was measured with a plate reader for each well in 4 positions. Cultures were afterwards washed 3  
679 times with PBS. Subsequently, residual fluorescence was measured in each well and normalised to  
680 the initial fluorescence intensity to calculate MiniV retention values after correction for background  
681 fluorescence and negative controls. Gigabody dilution curves for retention analysis were prepared by  
682 preincubating MiniVs with 1.6 nM Gigabody for 30 min at 4°C in the dark before addition to the  
683 cells.

684

#### 685 **Mouse immunisation experiments**

686 Female C57BL/6 mice were obtained from Charles River Laboratories (UK) and maintained at the  
687 University of Bristol Animal Services Unit in specific pathogen-free conditions in accordance with  
688 established practices and under a UK Home Office License<sup>83</sup>. Mice were immunised with 40 $\mu$ g  
689 ADDoCoV vaccine or ADDomer scaffold as a control via intranasal, intramuscular or subcutaneous  
690 routes (n = 10 mice per treatment group pooled across 2 experimental replicates) on day 0 (primary  
691 immunisation), day 21 (boost 1) and day 42 (boost 2). Mice were humanely euthanised on day 62; 9  
692 weeks post initial immunisation, by terminal exsanguination under general anaesthesia.

693 *Intranasal (IN)*. Mice were lightly anaesthetised using isoflurane, and 12.5  $\mu$ L ADDoCoV  
694 vaccine in sterile PBS (1.6 mg/ml) was instilled into each nostril (total dose 25  $\mu$ L; 40  $\mu$ g).

695 *Intramuscular (IM)*. Mice were lightly anaesthetised using isoflurane and received  
696 intramuscular injection with 50 $\mu$ L ADDoCoV vaccine in sterile PBS (0.8 mg/ml) into the quadriceps  
697 muscle using a 25G 5/8 inch needle (total dose 50  $\mu$ L; 40  $\mu$ g).

698 *Subcutaneous (SC)*. Non-anaesthetised mice were restrained in a tube restrainer.

699 Subcutaneous injection was performed with 50 $\mu$ L ADDoCoV vaccine in sterile PBS (0.8mg/ml)  
700 using a 25G 5/8 inch needle at the tail base (total dose 50  $\mu$ L; 40  $\mu$ g).

701 *Sample collection.* The presence of serum antibody was assayed in peripheral blood at  
702 baseline (day -1), day 20, and day 41 and in terminal bleeds on day 62. Peripheral blood samples  
703 (30-50 $\mu$ L) were collected from the lateral tail vein. For collection of terminal blood samples, mice  
704 were deeply anesthetised using isoflurane, and 500-800 $\mu$ L of blood was collected following  
705 thoracotomy and cardiac puncture. Peripheral blood and terminal bleed samples were processed for  
706 serum collection. Blood was collected into autoclaved microcentrifuge tubes without anti-coagulant  
707 and allowed to clot at room temperature for 20 min. Samples were centrifuged at 2000 g for 10 min  
708 at 4°C. Serum was transferred to a fresh microcentrifuge tube, and centrifugation was repeated at  
709 2000 g for 10 min at 4°C. Following centrifugation, serum was transferred to a fresh microcentrifuge  
710 tube and frozen in aliquots at -80°C. Nasal washes (NW) and bronchoalveolar lavages (BAL) were  
711 taken post-mortem using established methodology<sup>84,85</sup>.

712 The presence of mucosal antibody in murine nasal secretions were assayed by flushing a  
713 500 $\mu$ L volume of ice-cold PBS through the nasal turbinates. Briefly, scissors were used to make an  
714 incision from the abdomen to the jaw in order to expose the thoracic cage and neck. The trachea was  
715 exposed and a 20G x32mm Surflo intravenous catheter (VWR international) inserted. A 1 ml syringe  
716 containing 500 $\mu$ L PBS was then attached and the fluid used to flush the nasal cavity. Fluid existing  
717 the nares was captured using an Eppendorf and then incubated on ice with Protease inhibitor cocktail  
718 (Roche Diagnostics). Washes were centrifuged at 1000 g for 10 min at 4°C to remove cellular debris  
719 and mucus<sup>86</sup>. Fluid supernatants were transferred to fresh autoclaved microcentrifuge tubes and  
720 immediately frozen in aliquots at -80°C.

721 To isolate mucosal antibody in the lower respiratory tract, lung lavages were performed.  
722 Briefly, a 20G intravenous catheter with stylet withdrawn was inserted, directed towards the lungs. A  
723 syringe containing 1 ml ice-cold PBS was used to aspirate the lungs, ensuring not to overinflate and  
724 rupture the tissue. To prevent PBS from leaking from the catheter insertion site, thread was used to

725 tie off the catheter to the trachea. Recovered PBS from lung washes were again incubated on ice with  
726 protease inhibitor then centrifuged at 1000 g for 10 min at 4°C to remove cellular debris and mucus  
727 <sup>85</sup>. Fluid supernatants were transferred to fresh autoclaved microcentrifuge tubes and immediately  
728 frozen in aliquots at -80°C.

729

### 730 **Enzyme-linked immunosorbent assay (ELISA)**

731 *Antigen-specific serum antibody ELISA.* The antigen-specific IgG and IgA titres in mouse sera were  
732 assessed by a semi-quantitative ELISA. MaxiSorp high binding ELISA plates (Nunc) were coated  
733 with 100 µl/well of 1 µg/ml highly purified SARS-CoV-2 SARS-CoV-2 RBDs. For the IgG and  
734 IgA standards, plates were coated with 1:1000 dilution each of goat anti-mouse Kappa (Catalog  
735 #1050-01, Southern Biotech) and Lambda light chains (Catalog #1060-01, Southern Biotech). After  
736 overnight incubation at 4°C, the plates were washed 4 times with PBS-Tween 20 0.05% (v/v) and  
737 blocked for 1 h at 37°C with 200 µl/well blocking buffer (1% BSA (w/v) in PBS-Tween-20  
738 0.05%(v/v)). The plates were then washed, and 10-fold serial dilutions of serum samples ( $10^3$ - $10^6$ ),  
739 or a 5-fold dilution series starting at 200ng/ml of purified IgG (Catalog #0107-01, Southern Biotech)  
740 or IgA (Catalog #0106-01, Southern Biotech) were added using 50 µl/well volume. Plates were  
741 incubated for 1 h at 37°C, then washed and secondary antibody added at 1:2000 or 1:4000  
742 dilution in blocking buffer (100 µl/well) using either anti-mouse IgG-HRP (Catalog #1030-05,  
743 Southern Biotech), or anti-mouse IgA-biotin (Catalog #1040-80, Southern Biotech). After a 1h  
744 incubation at 37°C, plates incubated with biotinylated antibody were washed and incubated at 37°C  
745 for 1 hr with a 1/200 dilution of Streptavidin-HRP (Catalog #890803, R&D systems). Plates were  
746 then washed and developed using 100 µl/well SureBlue TMB (3,3', 5,5'-tetramethylbenzidine)  
747 substrate, and the reaction stopped after 5 min with 100 µl/well stop solution (Insight  
748 Biotechnologies). The absorbance was read on a FLUOstar Omega multi-mode microplate reader at  
749 450 nm (BMG LABTECH). For assaying mucosal samples for the presence of antigen-specific IgG  
750 and IgA antibody, the same procedure was followed except mucosal samples were used at a 1/10 -

751 1/250 dilution series. To determine the presence of cross-reactive antibody in the serum or mucosal  
752 secretions of vaccinated mice, the binding of antibody to different variants of SARS-CoV-2 RBD  
753 (Wuhan, Alpha, Beta, Delta and Omicron) was measured. Here, the variant RBDs were used to coat  
754 MaxiSorp high binding plates and ELISA performed as before.

755 *Nanobody ELISA.* Proteins ADDomer, ADDoCoV, RBD, S, Spike $\Delta$ AH and BSA were  
756 produced and purified as described<sup>57</sup>. Highly purified proteins were diluted in PBS to a final  
757 concentration of 40  $\mu$ g/ml. Next, 100  $\mu$ l of the diluted proteins were added to the corresponding well  
758 in a microtiter plate followed by a gentle tap to ensure even coating of all wells before sealing the  
759 plate and incubating overnight at 4°C. On the following day, supernatants were discarded and the  
760 plate washed 3 times with 300  $\mu$ l Wash Buffer (PBS pH 7.4, 0.1% Tween) before drying the plate by  
761 placing it upside down on a paper towel to remove residual Wash Buffer. Next, 200  $\mu$ l Blocking  
762 Solution (PBS pH 7.4, 5% milk) was added to each well, and the plate was incubated at room  
763 temperature for 1 hour. The nanobody samples were diluted in Wash Buffer to a concentration of  
764 1 $\mu$ M concentration. Subsequently, the Blocking Buffer was removed from plate before drying on a  
765 paper towel, followed by adding 100  $\mu$ l of corresponding nanobodies or control buffer, respectively,  
766 to each well of the plate before incubating the plates at room temperature for 1 hour. Next, the  
767 samples were removed from the plate, and the plate was washed with 300  $\mu$ l Wash Buffer 3 times  
768 and then dried on paper towel. Finally, 50  $\mu$ l of anti FLAG-HRP antibody (dilution 1:3000) was  
769 added to each well, and the plate was incubated at room temperature for 1 hour. Sample was  
770 removed, and the plate was washed with 300  $\mu$ l Wash Buffer 3 times and dried on a paper towel.  
771 Then, 100  $\mu$ l of TMB reagent was added to each well, followed by incubation at room temperature  
772 for 5 min and stopping the reaction with addition of 50  $\mu$ l of 1N HCl to each well. Finally,  
773 absorbance at 450 nm was measured in a microplate reader. The data was plotted using Microsoft  
774 excel. The standard deviation of triplicates was added as error bars.

775

776 **SARS-CoV-2 virus neutralisation assay**

777 Vero E6 cells engineered to express the cell surface protease TMPRSS2 (VeroE6-TMPRSS2)<sup>87</sup>  
778 (NIBSC) and Caco-2 cells engineered to express ACE2<sup>88</sup> were cultured at 37°C in 5% CO<sub>2</sub> in  
779 DMEM containing GlutaMAX (Gibco, Thermo Fisher) supplemented with 10% (v/v) FBS (Gibco)  
780 and 0.1 mM non-essential amino acids (NEAA, Sigma Aldrich). The ADAH11 nanobody was  
781 serially diluted 2-fold for eight dilutions, from a 0.85 µg/ml starting dilution, in triplicate, in  
782 Minimum Essential Media (MEM, Gibco) containing 2% (v/v) FBS and NEAA. The ancestral  
783 SARS-CoV-2 isolate hCoV-19/England/02/2020 (GISAID ID: EPI\_ISL\_407073) was grown on  
784 VeroE6-TMPRSS2 cells and titrated as previously described<sup>87</sup>. Virus (60 µl of 8 x 10<sup>4</sup> TCID<sub>50</sub>/ml)  
785 was mixed 1:1 with dilutions of ADAH11 and incubated for 60 min at 37°C. Following the  
786 incubation, supernatants were removed from Caco-2-ACE2 and VeroE6-TMPRSS2 cells seeded  
787 previously in µClear 96 well microplates (Greiner Bio-One) and replaced with 100 µl of the  
788 virus:sera dilutions followed by incubation for 18 hours at 37°C in 5% CO<sub>2</sub>. Control wells containing  
789 virus only (no ADAH11) as well as a positive control (a commercial monoclonal antibody (Absolute  
790 Antibody; Sb#15) recognising the S protein RBD) and media only negative control were also  
791 included on each plate. Cells were fixed by incubation in 4% paraformaldehyde for 60 min followed  
792 by permeabilisation with Triton-X100 and blocking with bovine serum albumin. Cells were stained  
793 with DAPI (Sigma Aldridge) and an antibody against the SARS-CoV-2 nucleocapsid protein (1:2000  
794 dilution, 200-401-A50, Rockland) in combination with a corresponding fluorophore conjugated  
795 secondary antibody (Goat anti-Rabbit, AlexaFluor 568, Thermo Fisher). Images were acquired on  
796 the ImageXpress Pico Automated Cell Imaging System (Molecular Devices) using a 10X objective.  
797 Stitched images of 9 fields covering the central 50% of the well were analysed for infected cells  
798 using Cell ReporterXpress software (Molecular Devices). Cell numbers were determined by  
799 automated counting of DAPI stained nuclei, infected cells were determined as those cells in which  
800 positive nucleocapsid staining, associated with a nucleus, was detected. The percentage of infected  
801 cells relative to control wells containing virus only (no ADAH11) were calculated.

802



803 **Surrogate virus neutralisation assay (sVNT)**

804 Remaining samples of sera from corresponding administration routes along with prebleed samples  
805 were pooled and passed through a protein A column and the recovered IgGs used in SARS-CoV-2  
806 surrogate virus neutralisation assays (sVNT) <sup>38</sup> using a commercial kit (GenScript).

807

808 **Statistics.** Statistical significance was determined by calculating standard deviations following  
809 standard mathematical formulae. For biochemical experiments, standard deviations were calculated  
810 from independent triplicates unless indicated otherwise. For mouse immunisation data, statistical  
811 analyses were carried out using a Mann-Whitney nonparametric *t* test and GraphPad Prism software.

812

813 **References**

- 814 1 Grana, C. *et al.* Efficacy and safety of COVID-19 vaccines. *Cochrane Database Syst Rev* **12**,  
815 CD015477 (2022). <https://doi.org/10.1002/14651858.CD015477>
- 816 2 Naz, S. S. & Munir, I. An Outline of Contributing Vaccine Technologies for SARS CoV2  
817 Advancing in Clinical and Preclinical Phase-Trials. *Recent Pat Biotechnol* **16**, 122-143 (2022).  
818 <https://doi.org/10.2174/1872208316666220118094344>
- 819 3 Li, Y. *et al.* A Comprehensive Review of the Global Efforts on COVID-19 Vaccine  
820 Development. *ACS Cent Sci* **7**, 512-533 (2021). <https://doi.org/10.1021/acscentsci.1c00120>
- 821 4 Watson, O. J. *et al.* Global impact of the first year of COVID-19 vaccination: a mathematical  
822 modelling study. *Lancet Infect Dis* **22**, 1293-1302 (2022). [https://doi.org/10.1016/S1473-3099\(22\)00320-6](https://doi.org/10.1016/S1473-3099(22)00320-6)
- 824 5 Lewis, L. M., Badkar, A. V., Cirelli, D., Combs, R. & Lerch, T. F. The Race to Develop the  
825 Pfizer-BioNTech COVID-19 Vaccine: From the Pharmaceutical Scientists' Perspective. *J Pharm*  
826 *Sci* (2022). <https://doi.org/10.1016/j.xphs.2022.09.014>
- 827 6 Frenck, R. W., Jr. *et al.* Safety, Immunogenicity, and Efficacy of the BNT162b2 Covid-19  
828 Vaccine in Adolescents. *N Engl J Med* **385**, 239-250 (2021).  
829 <https://doi.org/10.1056/NEJMoa2107456>
- 830 7 Polack, F. P. *et al.* Safety and Efficacy of the BNT162b2 mRNA Covid-19 Vaccine. *N Engl J*  
831 *Med* **383**, 2603-2615 (2020). <https://doi.org/10.1056/NEJMoa2034577>
- 832 8 Creech, C. B. *et al.* Evaluation of mRNA-1273 Covid-19 Vaccine in Children 6 to 11 Years of  
833 Age. *N Engl J Med* **386**, 2011-2023 (2022). <https://doi.org/10.1056/NEJMoa2203315>
- 834 9 El Sahly, H. M. *et al.* Efficacy of the mRNA-1273 SARS-CoV-2 Vaccine at Completion of  
835 Blinded Phase. *N Engl J Med* **385**, 1774-1785 (2021). <https://doi.org/10.1056/NEJMoa2113017>
- 836 10 Baden, L. R. *et al.* Efficacy and Safety of the mRNA-1273 SARS-CoV-2 Vaccine. *N Engl J*  
837 *Med* **384**, 403-416 (2021). <https://doi.org/10.1056/NEJMoa2035389>



- 838 11 Voysey, M. *et al.* Safety and efficacy of the ChAdOx1 nCoV-19 vaccine (AZD1222) against  
839 SARS-CoV-2: an interim analysis of four randomised controlled trials in Brazil, South Africa,  
840 and the UK. *Lancet* **397**, 99-111 (2021). [https://doi.org:10.1016/S0140-6736\(20\)32661-1](https://doi.org/10.1016/S0140-6736(20)32661-1)
- 841 12 Ramasamy, M. N. *et al.* Safety and immunogenicity of ChAdOx1 nCoV-19 vaccine  
842 administered in a prime-boost regimen in young and old adults (COV002): a single-blind,  
843 randomised, controlled, phase 2/3 trial. *Lancet* **396**, 1979-1993 (2021).  
844 [https://doi.org:10.1016/S0140-6736\(20\)32466-1](https://doi.org/10.1016/S0140-6736(20)32466-1)
- 845 13 Folegatti, P. M. *et al.* Safety and immunogenicity of the ChAdOx1 nCoV-19 vaccine against  
846 SARS-CoV-2: a preliminary report of a phase 1/2, single-blind, randomised controlled trial.  
847 *Lancet* **396**, 467-478 (2020). [https://doi.org:10.1016/S0140-6736\(20\)31604-4](https://doi.org/10.1016/S0140-6736(20)31604-4)
- 848 14 Polinski, J. M. *et al.* Durability of the Single-Dose Ad26.COV2.S Vaccine in the Prevention of  
849 COVID-19 Infections and Hospitalizations in the US Before and During the Delta Variant  
850 Surge. *JAMA Netw Open* **5**, e222959 (2022).  
851 [https://doi.org:10.1001/jamanetworkopen.2022.2959](https://doi.org/10.1001/jamanetworkopen.2022.2959)
- 852 15 Sadoff, J. *et al.* Safety and Efficacy of Single-Dose Ad26.COV2.S Vaccine against Covid-19. *N*  
853 *Engl J Med* **384**, 2187-2201 (2021). [https://doi.org:10.1056/NEJMoa2101544](https://doi.org/10.1056/NEJMoa2101544)
- 854 16 Heath, P. T. *et al.* Safety and Efficacy of NVX-CoV2373 Covid-19 Vaccine. *N Engl J Med* **385**,  
855 1172-1183 (2021). [https://doi.org:10.1056/NEJMoa2107659](https://doi.org/10.1056/NEJMoa2107659)
- 856 17 Heath, P. T. *et al.* Safety and Efficacy of the NVX-CoV2373 COVID-19 Vaccine at Completion  
857 of the Placebo-Controlled Phase of a Randomized Controlled Trial. *Clin Infect Dis* (2022).  
858 [https://doi.org:10.1093/cid/ciac803](https://doi.org/10.1093/cid/ciac803)
- 859 18 Keech, C. *et al.* Phase 1-2 Trial of a SARS-CoV-2 Recombinant Spike Protein Nanoparticle  
860 Vaccine. *N Engl J Med* **383**, 2320-2332 (2020). [https://doi.org:10.1056/NEJMoa2026920](https://doi.org/10.1056/NEJMoa2026920)
- 861 19 Hatcher, S. M. *et al.* COVID-19 Vaccine Effectiveness: A Review of the First 6 Months of  
862 COVID-19 Vaccine Availability (1 January-30 June 2021). *Vaccines (Basel)* **10** (2022).  
863 [https://doi.org:10.3390/vaccines10030393](https://doi.org/10.3390/vaccines10030393)
- 864 20 Fahrni, M. L. *et al.* Management of COVID-19 vaccines cold chain logistics: a scoping review. *J*  
865 *Pharm Policy Pract* **15**, 16 (2022). [https://doi.org:10.1186/s40545-022-00411-5](https://doi.org/10.1186/s40545-022-00411-5)
- 866 21 Nachega, J. B. *et al.* Addressing challenges to rolling out COVID-19 vaccines in African  
867 countries. *Lancet Glob Health* **9**, e746-e748 (2021). [https://doi.org:10.1016/S2214-109X\(21\)00097-8](https://doi.org/10.1016/S2214-109X(21)00097-8)
- 869 22 Lennon, P. *et al.* Root cause analysis underscores the importance of understanding, addressing,  
870 and communicating cold chain equipment failures to improve equipment performance. *Vaccine*  
871 **35**, 2198-2202 (2017). [https://doi.org:10.1016/j.vaccine.2016.09.068](https://doi.org/10.1016/j.vaccine.2016.09.068)
- 872 23 Ashok, A., Brison, M. & LeTallec, Y. Improving cold chain systems: Challenges and solutions.  
873 *Vaccine* **35**, 2217-2223 (2017). [https://doi.org:10.1016/j.vaccine.2016.08.045](https://doi.org/10.1016/j.vaccine.2016.08.045)
- 874 24 World Health Organisation WHO *Monitoring vaccine wastage at country level : guidelines for*  
875 *programme managers*, <https://apps.who.int/iris/handle/10665/68463> (2005).
- 876 25 Diaz, D., Care, A. & Sunna, A. Bioengineering Strategies for Protein-Based Nanoparticles.  
877 *Genes (Basel)* **9** (2018). [https://doi.org:10.3390/genes9070370](https://doi.org/10.3390/genes9070370)
- 878 26 Bhardwaj, P., Bhatia, E., Sharma, S., Ahamad, N. & Banerjee, R. Advancements in prophylactic  
879 and therapeutic nanovaccines. *Acta Biomater* **108**, 1-21 (2020).  
880 [https://doi.org:10.1016/j.actbio.2020.03.020](https://doi.org/10.1016/j.actbio.2020.03.020)
- 881 27 Bezbaruah, R. *et al.* Nanoparticle-Based Delivery Systems for Vaccines. *Vaccines (Basel)* **10**  
882 (2022). [https://doi.org:10.3390/vaccines10111946](https://doi.org/10.3390/vaccines10111946)

- 883 28 Vragniau, C. *et al.* Synthetic self-assembling ADDomer platform for highly efficient vaccination  
884 by genetically encoded multiepitope display. *Sci Adv* **5**, eaaw2853 (2019).  
885 <https://doi.org/10.1126/sciadv.aaw2853>
- 886 29 Besson, S., Vragniau, C., Vassal-Stermann, E., Dagher, M. C. & Fender, P. The Adenovirus  
887 Dodecahedron: Beyond the Platonic Story. *Viruses* **12** (2020).  
888 <https://doi.org/10.3390/v12070718>
- 889 30 Sari-Ak, D. *et al.* VLP-factory and ADDomer((c)) : Self-assembling Virus-Like Particle (VLP)  
890 Technologies for Multiple Protein and Peptide Epitope Display. *Curr Protoc* **1**, e55 (2021).  
891 <https://doi.org/10.1002/cpz1.55>
- 892 31 Schaffitzel, C., Zahnd, C., Amstutz, P., Luginbühl, B. & Plückthun, A. In vitro Selection and  
893 Evolution of Protein-Ligand Interactions by Ribosome Display. . *In: Protein-Protein*  
894 *Interactions: A Molecular Cloning Manual. 2nd edition. Eds: E. Golemis & P. Adams, Cold*  
895 *Spring Harbor Laboratory Press, New York. Chapter 27.* (2005).
- 896 32 Wrapp, D. *et al.* Cryo-EM structure of the 2019-nCoV spike in the prefusion conformation.  
897 *Science* **367**, 1260-1263 (2020). <https://doi.org/10.1126/science.abb2507>
- 898 33 Walls, A. C. *et al.* Structure, Function, and Antigenicity of the SARS-CoV-2 Spike  
899 Glycoprotein. *Cell* **181**, 281-292 e286 (2020). <https://doi.org/10.1016/j.cell.2020.02.058>
- 900 34 Toelzer, C. *et al.* Free fatty acid binding pocket in the locked structure of SARS-CoV-2 spike  
901 protein. *Science* **370**, 725-730 (2020). <https://doi.org/10.1126/science.abd3255>
- 902 35 Zubieta, C., Schoehn, G., Chroboczek, J. & Cusack, S. The structure of the human adenovirus 2  
903 penton. *Mol Cell* **17**, 121-135 (2005). <https://doi.org/10.1016/j.molcel.2004.11.041>
- 904 36 Stauffer, O. *et al.* Synthetic virions reveal fatty acid-coupled adaptive immunogenicity of SARS-  
905 CoV-2 spike glycoprotein. *Nat Commun* **13**, 868 (2022). [https://doi.org/10.1038/s41467-022-](https://doi.org/10.1038/s41467-022-28446-x)  
906 [28446-x](https://doi.org/10.1038/s41467-022-28446-x)
- 907 37 Focosi, D., Maggi, F. & Casadevall, A. Mucosal Vaccines, Sterilizing Immunity, and the Future  
908 of SARS-CoV-2 Virulence. *Viruses*. **14**:187 (2022). <https://doi.org/10.3390/v14020187>. PMID:  
909 35215783
- 910 38 Tan, C.W. *et al.* A SARS-CoV-2 surrogate virus neutralization test based on antibody-mediated  
911 blockage of ACE2–spike protein–protein interaction. *Nat Biotechnol* **38**, 1073–1078 (2020).  
912 <https://doi.org/10.1038/s41587-020-0631-z>
- 913 39 Feng, S. *et al.* Correlates of protection against symptomatic and asymptomatic SARS-CoV-2  
914 infection. *Nat Med* **27**, 2032–2040 (2021). <https://doi.org/10.1038/s41591-021-01540-1>
- 915 40 Abreu-Mota, T. *et al.* Non-neutralizing antibodies elicited by recombinant Lassa-Rabies vaccine  
916 are critical for protection against Lassa fever. *Nat Commun*. **9**:4223. (2018)  
917 <https://doi.org/10.1038/s41467-018-06741-w>
- 918 41 Earnest, J.T. *et al.* The mechanistic basis of protection by non-neutralizing anti-alphavirus  
919 antibodies. *Cell Rep*. **35**:108962 (2021). <https://doi.org/10.1016/j.celrep.2021.108962>. PMID:  
920 33826892; PMCID: PMC8055377.
- 921 42 Carragher, D.M., Kaminski, D.A., Moquin, A., Hartson, L. & Randall, T.D. A novel role for  
922 non-neutralizing antibodies against nucleoprotein in facilitating resistance to influenza virus. *J*  
923 *Immunol*. **181**, 4168-4176 (2008). <https://doi.org/10.4049/jimmunol.181.6.4168>
- 924 43 Russell, M.W., Moldoveanu, Z., Ogra, P.L. & Mestecky, J. Mucosal Immunity in COVID-19: A  
925 Neglected but Critical Aspect of SARS-CoV-2 Infection. *Front Immunol*. **11**:611337 (2020).  
926 <https://doi.org/10.3389/fimmu.2020.611337>
- 927 44 Chao, Y.X., Röttschke, O. & Tan, E.K. The role of IgA in COVID-19. *Brain Behav Immun*. **87**,  
928 182-183 (2020). <https://doi.org/10.1016/j.bbi.2020.05.057>

- 929 45 Luo, C. *et al.* Using Self-Assembling ADDomer Platform to Display B and T Epitopes of Type  
930 O Foot-and-Mouth Disease Virus. *Viruses* **14** (2022). <https://doi.org/10.3390/v14081810>
- 931 46 Cohen, A. A. *et al.* Mosaic RBD nanoparticles protect against challenge by diverse  
932 sarbecoviruses in animal models. *Science* **377**, eabq0839 (2022).  
933 <https://doi.org/10.1126/science.abq0839>
- 934 47 Walls, A. C. *et al.* Elicitation of Potent Neutralizing Antibody Responses by Designed Protein  
935 Nanoparticle Vaccines for SARS-CoV-2. *Cell* **183**, 1367-1382 e1317 (2020).  
936 <https://doi.org/10.1016/j.cell.2020.10.043>
- 937 48 Chevillard, C. *et al.* Elicitation of potent SARS-CoV-2 neutralizing antibody responses through  
938 immunization with a versatile adenovirus-inspired multimerization platform. *Mol Ther* **30**, 1913-  
939 1925 (2022). <https://doi.org/10.1016/j.ymthe.2022.02.011>
- 940 49 Chen, Y. *et al.* Crystal structure of the receptor-binding domain from newly emerged Middle  
941 East respiratory syndrome coronavirus. *J Virol* **87**, 10777-10783 (2013).  
942 <https://doi.org/10.1128/JVI.01756-13>
- 943 50 Li, F., Li, W., Farzan, M. & Harrison, S. C. Structure of SARS coronavirus spike receptor-  
944 binding domain complexed with receptor. *Science* **309**, 1864-1868 (2005).  
945 <https://doi.org/10.1126/science.1116480>
- 946 51 Wang, Q. *et al.* Immunodominant SARS Coronavirus Epitopes in Humans Elicited both  
947 Enhancing and Neutralizing Effects on Infection in Non-human Primates. *ACS Infect Dis* **2**, 361-  
948 376 (2016). <https://doi.org/10.1021/acscinfecdis.6b00006>
- 949 52 Yuan, Y. *et al.* Cryo-EM structures of MERS-CoV and SARS-CoV spike glycoproteins reveal  
950 the dynamic receptor binding domains. *Nat Commun* **8**, 15092 (2017).  
951 <https://doi.org/10.1038/ncomms15092>
- 952 53 Gorda, B., Toelzer, C., Aulicino, F. & Berger, I. The MultiBac BEVS: Basics, applications,  
953 performance and recent developments. *Methods Enzymol* **660**, 129-154 (2021).  
954 <https://doi.org/10.1016/bs.mie.2021.06.018>
- 955 54 Sari, D. *et al.* The MultiBac Baculovirus/Insect Cell Expression Vector System for Producing  
956 Complex Protein Biologics. *Adv Exp Med Biol* **896**, 199-215 (2016).  
957 [https://doi.org/10.1007/978-3-319-27216-0\\_13](https://doi.org/10.1007/978-3-319-27216-0_13)
- 958 55 Bieniossek, C., Richmond, T. J. & Berger, I. MultiBac: multigene baculovirus-based eukaryotic  
959 protein complex production. *Curr Protoc Protein Sci* Chapter 5, Unit 5 20 (2008).  
960 <https://doi.org/10.1002/0471140864.ps0520s51>
- 961 56 Szurgot, I. *et al.* Adenovirus Dodecahedron, a VLP, Can be Purified by Size Exclusion  
962 Chromatography Instead of Time-Consuming Sucrose Density Gradient Centrifugation. *Mol*  
963 *Biotechnol* **57**, 565-573 (2015). <https://doi.org/10.1007/s12033-015-9850-9>
- 964 57 Toelzer, C. *et al.* The free fatty acid-binding pocket is a conserved hallmark in pathogenic beta-  
965 coronavirus spike proteins from SARS-CoV to Omicron. *Sci Adv* **8**, eadc9179 (2022).  
966 <https://doi.org/10.1126/sciadv.adc9179>
- 967 58 Els Conrath, K., Lauwereys, M., Wyns, L. & Muyldermans, S. Camel single-domain antibodies  
968 as modular building units in bispecific and bivalent antibody constructs. *J Biol Chem* **276**, 7346-  
969 7350 (2001). <https://doi.org/10.1074/jbc.M007734200>
- 970 59 Scheres, S. H. RELION: implementation of a Bayesian approach to cryo-EM structure  
971 determination. *J Struct Biol* **180**, 519-530 (2012). <https://doi.org/10.1016/j.jsb.2012.09.006>
- 972 60 Zheng, S. Q. *et al.* MotionCor2: anisotropic correction of beam-induced motion for improved  
973 cryo-electron microscopy. *Nat Methods* **14**, 331-332 (2017). <https://doi.org/10.1038/nmeth.4193>
- 974 61 Zhang, K. Gctf: Real-time CTF determination and correction. *J Struct Biol* **193**, 1-12 (2016).  
975 <https://doi.org/10.1016/j.jsb.2015.11.003>

- 976 62 Kimanius, D., Dong, L., Sharov, G., Nakane, T. & Scheres, S. H. W. New tools for automated  
977 cryo-EM single-particle analysis in RELION-4.0. *Biochem J* **478**, 4169-4185 (2021).  
978 <https://doi.org/10.1042/BCJ20210708>
- 979 63 Goddard, T. D., Huang, C. C. & Ferrin, T. E. Visualizing density maps with UCSF Chimera. *J*  
980 *Struct Biol* **157**, 281-287 (2007). <https://doi.org/10.1016/j.jsb.2006.06.010>
- 981 64 Zhang, Y. I-TASSER server for protein 3D structure prediction. *BMC Bioinformatics* **9**, 40  
982 (2008). <https://doi.org/10.1186/1471-2105-9-40>
- 983 65 Emsley, P. & Cowtan, K. Coot: model-building tools for molecular graphics. *Acta Crystallogr D*  
984 *Biol Crystallogr* **60**, 2126-2132 (2004). <https://doi.org/10.1107/S0907444904019158>
- 985 66 Afonine, P. V. *et al.* Real-space refinement in PHENIX for cryo-EM and crystallography. *Acta*  
986 *Crystallogr D Struct Biol* **74**, 531-544 (2018). <https://doi.org/10.1107/S2059798318006551>
- 987 67 Chen, V. B. *et al.* MolProbity: all-atom structure validation for macromolecular crystallography.  
988 *Acta Crystallogr D Biol Crystallogr* **66**, 12-21 (2010).  
989 <https://doi.org/10.1107/S0907444909042073>
- 990 68 Wu, L. *et al.* Broad host range of SARS-CoV-2 and the molecular basis for SARS-CoV-2  
991 binding to cat ACE2. *Cell Discov* **6**, 68 (2020). <https://doi.org/10.1038/s41421-020-00210-9>
- 992 69 Mandell, D. J., Coutsiias, E. A. & Kortemme, T. Sub-angstrom accuracy in protein loop  
993 reconstruction by robotics-inspired conformational sampling. *Nat Methods* **6**, 551-552 (2009).  
994 <https://doi.org/10.1038/nmeth0809-551>
- 995 70 Tyka, M. D. *et al.* Alternate states of proteins revealed by detailed energy landscape mapping. *J*  
996 *Mol Biol* **405**, 607-618 (2011). <https://doi.org/10.1016/j.jmb.2010.11.008>
- 997 71 DiMaio, F., Leaver-Fay, A., Bradley, P., Baker, D. & Andre, I. Modeling symmetric  
998 macromolecular structures in Rosetta3. *PLoS One* **6**, e20450 (2011).  
999 <https://doi.org/10.1371/journal.pone.0020450>
- 1000 72 Andre, I., Bradley, P., Wang, C. & Baker, D. Prediction of the structure of symmetrical protein  
1001 assemblies. *Proc Natl Acad Sci U S A* **104**, 17656-17661 (2007).  
1002 <https://doi.org/10.1073/pnas.0702626104>
- 1003 73 Huang, P. S. *et al.* RosettaRemodel: a generalized framework for flexible backbone protein  
1004 design. *PLoS One* **6**, e24109 (2011). <https://doi.org/10.1371/journal.pone.0024109>
- 1005 74 Bekker, H. *et al.* Gromacs: A parallel computer for molecular dynamics simulations. *In Physics*  
1006 *computing 92. Edited by R.A. de Groot and J. Nadrchal. World Scientific, Singapore, 1993.*  
1007 (1993).
- 1008 75 Case, D. A. *et al.* Amber2022. *University of California, San Francisco* (2022).
- 1009 76 McGibbon, R. T. *et al.* MDTraj: A Modern Open Library for the Analysis of Molecular  
1010 Dynamics Trajectories. *Biophys J* **109**, 1528-1532 (2015).  
1011 <https://doi.org/10.1016/j.bpj.2015.08.015>
- 1012 77 Pedregosa, F. *et al.* Scikit-learn: Machine Learning in Python. *J. Mach. Learn. Res.* **12**, 2825–  
1013 2830. (2011).
- 1014 78 Berthelmann, A., Lach, J., Grawert, M. A., Groll, M. & Eichler, J. Versatile C(3)-symmetric  
1015 scaffolds and their use for covalent stabilization of the foldon trimer. *Org Biomol Chem* **12**,  
1016 2606-2614 (2014). <https://doi.org/10.1039/c3ob42251h>
- 1017 79 Du, Z. *et al.* The trRosetta server for fast and accurate protein structure prediction. *Nat Protoc*  
1018 **16**, 5634-5651 (2021). <https://doi.org/10.1038/s41596-021-00628-9>
- 1019 80 Yang, L. *et al.* New-generation amber united-atom force field. *J Phys Chem B* **110**, 13166-  
1020 13176 (2006). <https://doi.org/10.1021/jp060163v>



- 1021 81 Tsui, V. & Case, D. A. Theory and applications of the generalized Born solvation model in  
1022 macromolecular simulations. *Biopolymers* **56**, 275-291 (2000). <https://doi.org/10.1002/1097->  
1023 0282(2000)56:4<275::AID-BIP10024>3.0.CO;2-E
- 1024 82 Cortese, M. *et al.* Integrative Imaging Reveals SARS-CoV-2-Induced Reshaping of Subcellular  
1025 Morphologies. *Cell Host Microbe* **28**, 853-866 (2022). [https://doi.org/10.1016/](https://doi.org/10.1016/j.chom.2020.11.003)  
1026 [j.chom.2020.11.003](https://doi.org/10.1016/j.chom.2020.11.003).
- 1027 83 Morgan, D. J. *et al.* CD8(+) T cell-mediated spontaneous diabetes in neonatal mice. *J Immunol*  
1028 **157**, 978-983 (1996).
- 1029 84 Cisney, E. D., Fernandez, S., Hall, S. I., Krietz, G. A. & Ulrich, R. G. Examining the role of  
1030 nasopharyngeal-associated lymphoreticular tissue (NALT) in mouse responses to vaccines. *J Vis*  
1031 *Exp*, 3960 (2012). <https://doi.org/10.3791/3960>
- 1032 85 Van Hoecke, L., Job, E. R., Saelens, X. & Roose, K. Bronchoalveolar Lavage of Murine Lungs  
1033 to Analyze Inflammatory Cell Infiltration. *J Vis Exp* (2017). <https://doi.org/10.3791/55398>
- 1034 86 Mann, J. F. *et al.* Pulmonary delivery of DNA vaccine constructs using deacylated PEI elicits  
1035 immune responses and protects against viral challenge infection. *J Control Release* **170**, 452-459  
1036 (2013). <https://doi.org/10.1016/j.jconrel.2013.06.004>
- 1037 87 Matsuyama, S. *et al.* Enhanced isolation of SARS-CoV-2 by TMPRSS2-expressing cells. *Proc*  
1038 *Natl Acad Sci U S A* **117**, 7001-7003 (2020). <https://doi.org/10.1073/pnas.2002589117>
- 1039 88 Gupta, K. *et al.* Structural insights in cell-type specific evolution of intra-host diversity by  
1040 SARS-CoV-2. *Nat Commun* **13**, 222 (2022). <https://doi.org/10.1038/s41467-021-27881-6>
- 1041 89 Benton, D. J. *et al.* Receptor binding and priming of the spike protein of SARS-CoV-2 for  
1042 membrane fusion. *Nature* **588**, 327-330 (2020). <https://doi.org/10.1038/s41586-020-2772-0>  
1043

1044 **Acknowledgements:** We thank all members, present and past, of the Berger and Schaffitzel  
1045 laboratories, and the colleagues from Bristol UNCOVER group, for their contributions and helpful  
1046 discussions. We acknowledge support and assistance by the Wolfson Bioimaging Facility and the  
1047 GW4 Facility for High-Resolution Electron Cryo-Microscopy funded by the Wellcome Trust  
1048 (202904/Z/16/Z and 206181/Z/17/Z) and BBSRC (BB/R000484/1). We are grateful for support from  
1049 the Oracle Higher Education and Research program to enable cryo-EM data processing using  
1050 Oracle's high-performance public cloud infrastructure ([https://cloud.oracle.com/en\\_US/cloud-](https://cloud.oracle.com/en_US/cloud-)  
1051 [infrastructure](https://cloud.oracle.com/en_US/cloud-)), and we thank Simon Burbidge, Christopher Woods, Matt Williams and Richard Pitts  
1052 for computation infrastructure support. This work was carried out using the computational and data  
1053 storage facilities of the [Advanced Computing Research Centre](#), University of Bristol. The authors  
1054 thank University of Bristol and the Max Planck Gesellschaft (MPG), Germany, for generous support  
1055 through the Max Planck Bristol Centre for Minimal Biology (MPBC).

1056

1057 **Funding:** We acknowledge support and assistance by the Wolfson Bioimaging Facility and the GW4  
1058 Facility for High-Resolution Electron Cryo-Microscopy funded by the Wellcome Trust  
1059 (202904/Z/16/Z and 206181/Z/17/Z) and BBSRC (BB/R000484/1). This research received support  
1060 from BrisSynBio, a BBSRC/EPSRC Research Centre for synthetic biology at the University of  
1061 Bristol (BB/L01386X/1) (to I.B., C.S., A.B., A.J.M.). O.S. acknowledges support from the Elisabeth  
1062 Muerer Foundation, the Max Planck School Matter to Life and the Heidelberg Biosciences  
1063 International Graduate School. J.S. is the Weston Visiting Professor at the Weizmann Institute of  
1064 Science, part of the excellence cluster CellNetworks at Heidelberg University and acknowledges  
1065 funding from the European Research Council (ERC, contract no. 294852), SynAd and the  
1066 MaxSynBio Consortium, funded by the Federal Ministry of Education and Research of Germany and  
1067 the Max Planck Society, from the SFB 1129 and Project 240245660-SFB1129 P15 of the German  
1068 Research Foundation (DFG) and from the Volkswagen Stiftung (priority call “Life?”). A.D.D. is  
1069 supported by the United States Food and Drug Administration (HHSF223201510104C) and UK  
1070 Research and Innovation/Medical Research Council (MRC) (MR/V027506/1). M.K.W. was  
1071 supported by MRC grants MR/R020566/1 and MR/V027506/1 (awarded to A.D.D). A.J.M. is  
1072 supported the British Society for Antimicrobial Chemotherapy (BSAC-COVID-30) and the EPSRC  
1073 (EP/M022609/1, CCP-BioSim) I.B. acknowledges support from the EPSRC Future Vaccine  
1074 Manufacturing and Research Hub (EP/R013764/1) and the ERC (AdvG 834631). C.S. and I.B. are  
1075 Investigators of the Wellcome Trust (210701/Z/18/Z; 106115/Z/14/Z). C.S., I.B., S.H., F.D. and  
1076 R.V. are supported by Horizon 2020 FET OPEN ‘ADDovenom’ (899670).

1077

1078 **Author contributions:** F.G., C.S. and I.B. conceived the study. F.G., D.B., K.G., J.C., C.F., A.H.,  
1079 G.B., S.H., M.V.V., F.D. and R.V. produced and purified protein samples, and carried out  
1080 biochemical and biophysical experiments. S.K.N.Y. and U.B. prepared grids and collected EM data,  
1081 S.K.N.Y. carried out image processing, D.B., A.B. and J.C.B. carried out model building and  
1082 structural analysis. H.A.B., A.J.M. and J.L.R.A. performed and interpreted simulations. M.K.W. and

1083 A.D.D. performed live virus CL3 work and analyzed data. O.S. and J.S. performed and analyzed  
1084 synthetic SARS-CoV-2 virion experiments. E.M., G.E., B.V.V.M., O.F., J.R., L.W., J.H., D.M.,  
1085 J.M., A.F. and M.B. planned, performed and analyzed mouse immunisation experiments. D.B., F.G.,  
1086 C.S. and I.B. wrote the manuscript with input from all authors.

1087

1088 **Competing interests:** C.S., K.G. and I.B. report shareholding in Halo Therapeutics Ltd unrelated to  
1089 this Correspondence. I.B. reports shareholding in Geneva Biotech SARL, unrelated to this  
1090 correspondence. F.G., J.H. and I.B. report shareholding in Imophoron Ltd, related to this  
1091 Correspondence. Patents and patent applications have been filed related to ADDomer vaccines and  
1092 therapeutics (WO2017167988A, EP22191583.8). The other authors do not declare competing  
1093 interests. ADDomer is a registered trademark of Imophoron Ltd.

1094

1095 **Data availability:** All data needed to evaluate the conclusions in the paper are present in the paper  
1096 and/or the Supplementary Materials. All datasets generated during the current study have been  
1097 deposited in the Electron Microscopy Data Bank (EMDB) under accession numbers EMD-16512  
1098 (ADDoCoV), EMD-16522 (ADDoCoV-ADAH11), and in the Protein Data Bank (PDB) under  
1099 accession number PDB ID 8C9N (ADDoCoV). Reagents are available from F.G., C.S. and I.B.

1100

1101

1102

1103

1104 **Figures**

1105 **Fig. 1: Self-assembling thermostable ADDoCoV candidate vaccine**

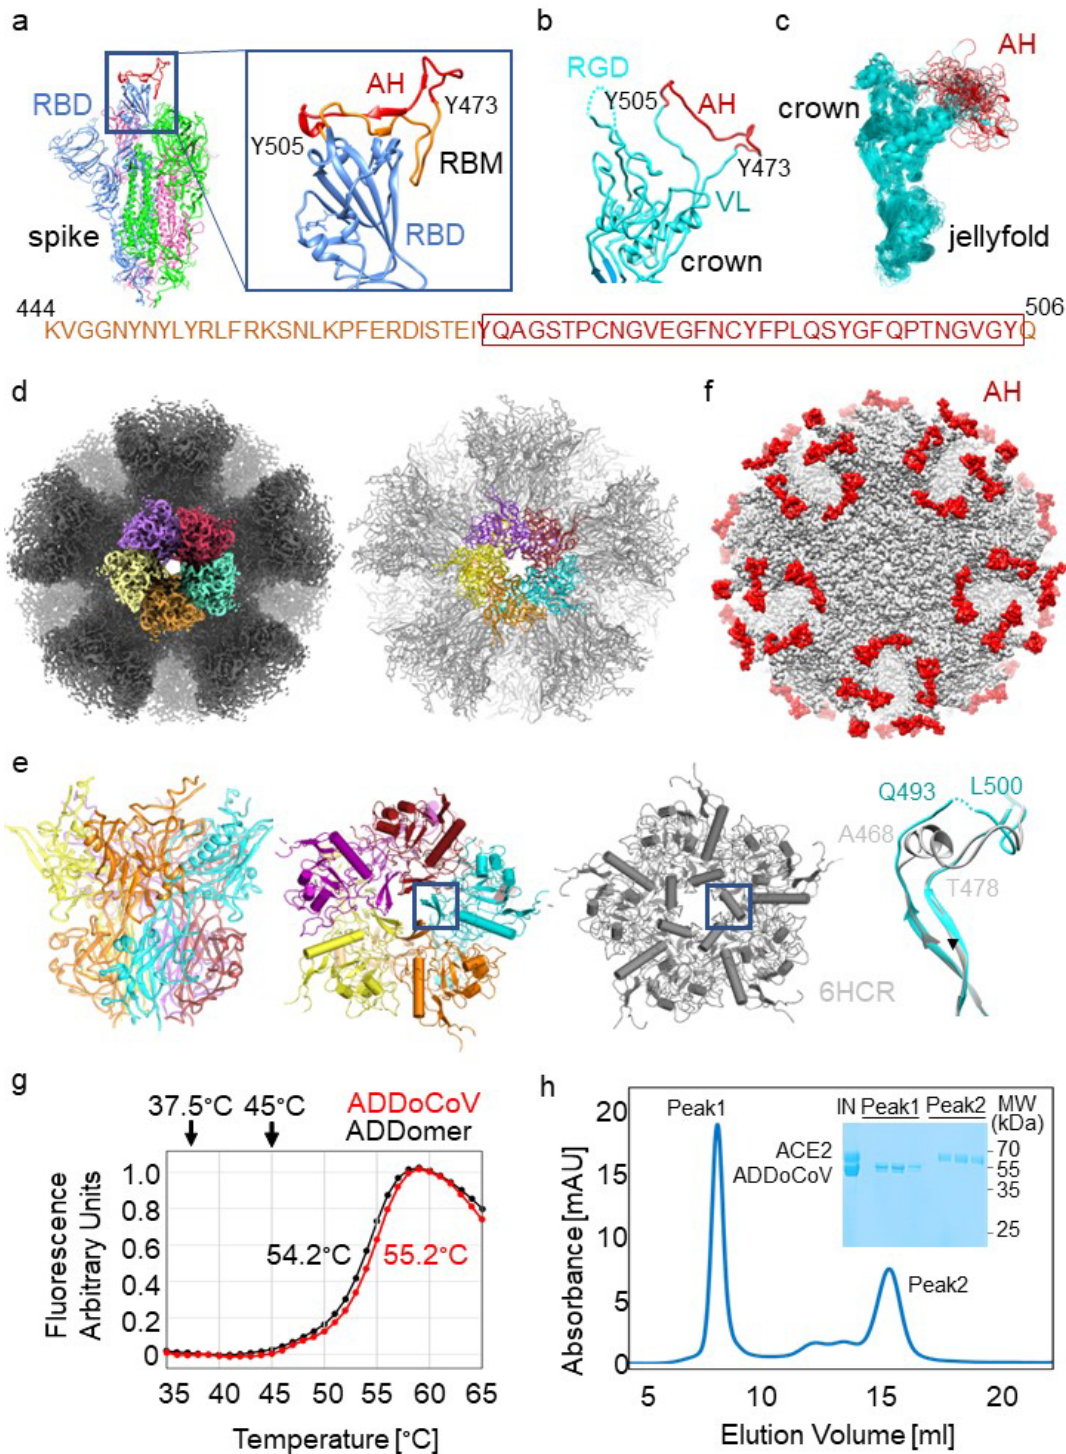

1106

1107 **(a)** SARS-CoV-2 S protein (magenta, green and blue) shown in the open conformation (PDBID  
1108 7A94)<sup>89</sup>. The zoom-in (right) on the RBD in the ‘up’ position (blue) depicts an ordered RBM (AA  
1109 sequence provided below). The AH epitope (residue 473-505) is highlighted in red. **(b)** The  
1110 ADDomer protomer crown domain (cyan) is shown. VL, variable loop; RGD, arginine-glycine-



1111 aspartate loop. AH (red) was inserted in VL. **(c)** MD simulations of the ADDoCoV protomer  
1112 showing highly defined crown domain (cyan) while the AH epitope (red) in VL samples a range of  
1113 conformations (RGD loop omitted for clarity). **(d)** Cryo-EM density (left) and model (right) of  
1114 ADDoCoV. Five protomer (purple, firebrick, cyan, orange, yellow) form one penton. Twelve  
1115 pentons form the nanoparticle. **(e)** One penton is depicted in a side view (left) and from the top  
1116 (middle), coloured as in panel d. For comparison, a penton from the ADDomer scaffold (PDBID  
1117 6HCR)<sup>28</sup> is shown (grey). A central region is boxed. Overlay of the boxed regions highlights  
1118 unfolding of a central  $\alpha$ -helix in the ADDoCoV protomer crown domain. **(f)** Model of ADDoCoV  
1119 (grey) with AH epitopes coloured in red. **(g)** Thermal unfolding curves of ADDomer scaffold (black)  
1120 and ADDoCoV (red) demonstrate high thermotolerance. Melting temperatures are indicated. **(h)**  
1121 SEC profile and Coomassie-stained SDS PAGE section (inset) showing ADDoCoV (Peak1) and  
1122 ACE2 (Peak2) eluting separately. IN, injected sample.

1123 **Fig. 2: *In vitro* generated neutralising nanobodies validate ADDoCoV design**

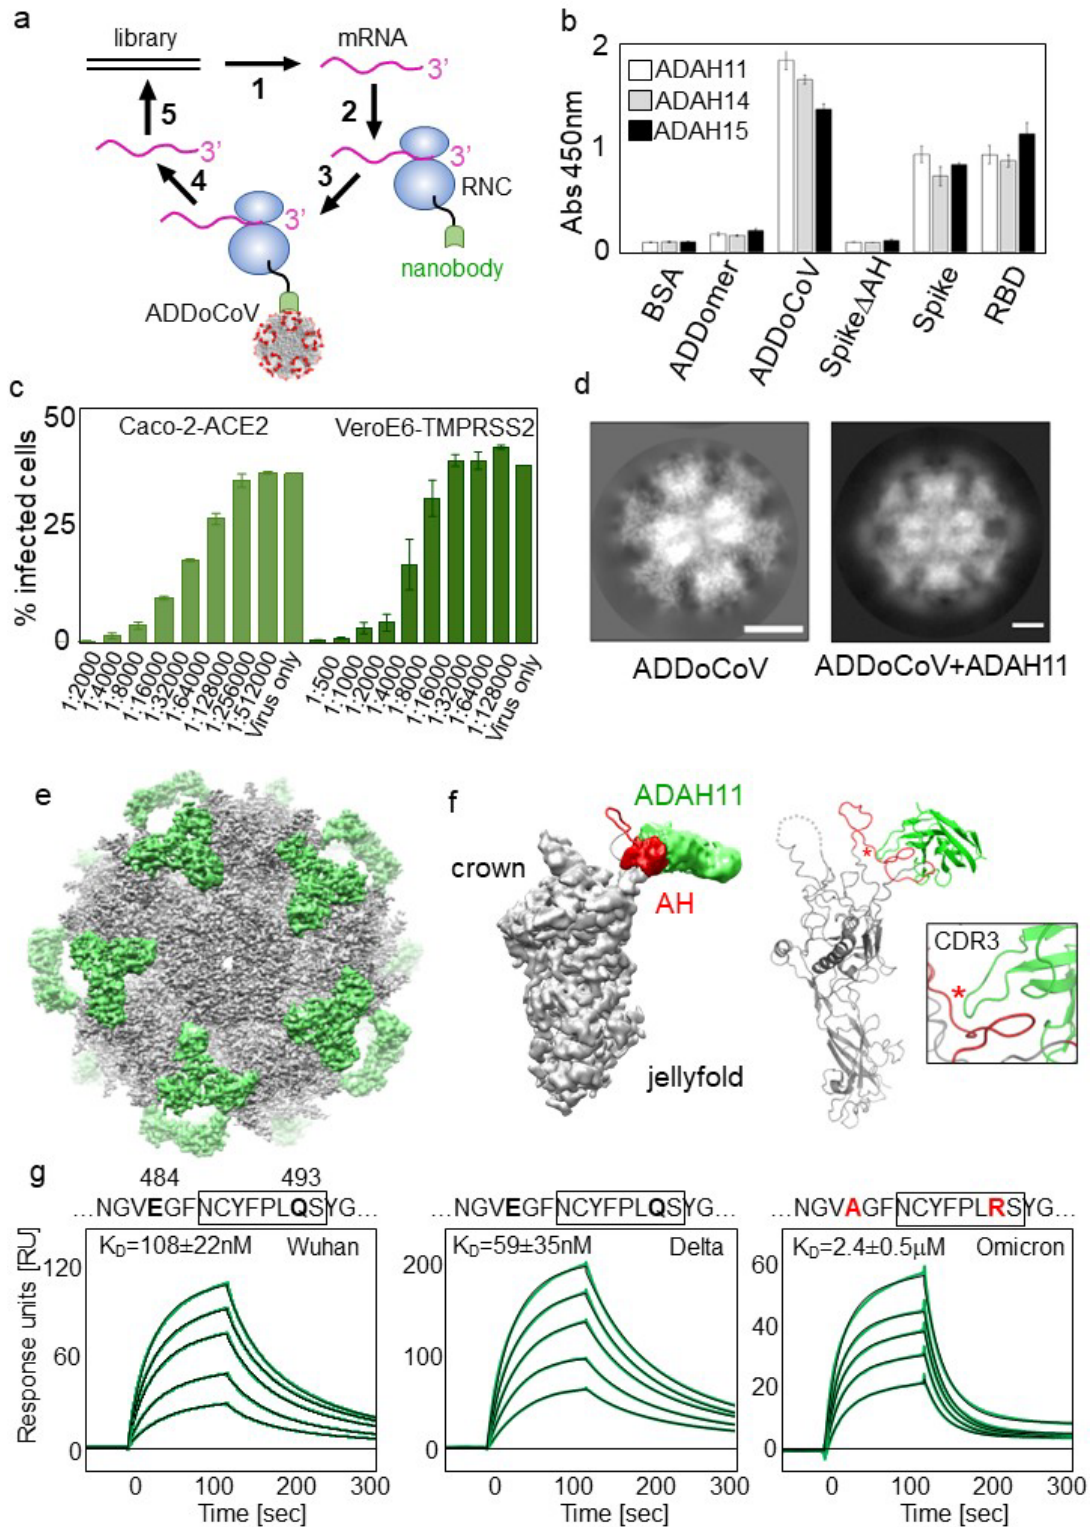

1124

1125 (a) Ribosome display in a schematic view. A DNA library encoding nanobodies is transcribed (1)  
 1126 and translated (2) *in vitro*. The stop codons in mRNAs are deleted. Resulting ribosome nascent-chain  
 1127 complexes (RNCs) displaying nanobodies are used for panning (3) against ADDoCoV antigen. After

1128 washing, the mRNA of bound RNCs is eluted (4) and DNA recovered by RT-PCR (5). The process  
1129 is iterative. **(b)** ELISA of three selected nanobodies evidencing binding to ADDoCoV, S and RBD,  
1130 but not to BSA, ADDomer scaffold, or a S mutant with AH deleted (Spike $\Delta$ AH). **(c)** SARS-CoV-2  
1131 neutralisation by ADAH11 using ACE2 expressing Caco-2 (left) and TMPRSS2-expressing Vero E6  
1132 cells (right). Dilutions indicated were sampled in triplicates. **(d)** Reference-free 2D class averages of  
1133 ADDoCoV (left) and of ADDoCoV-ADAH11 nanobody complex (right) evidence halo of density  
1134 corresponding to bound nanobody. **(e)** Cryo-EM structure of ADDoCoV (grey density) with bound  
1135 nanobody (green). **(f)** Symmetry expansion (left) of ADDoCoV protomer (grey) with nanobody  
1136 (green, filtered to  $\sim 10\text{\AA}$  resolution) bound to AH epitope (red). The corresponding molecular model  
1137 (right) suggests ADAH11 recognising a central section of AH. Location of an arginine residue in the  
1138 ADAH11 CDR3 is marked (asterisk). **(g)** SPR of ADAH11 binding to immobilised Wuhan (left),  
1139 Delta (middle) and Omicron (right) RBDs, at concentrations 50 nM to 250 nM for Wuhan and Delta,  
1140 and 1  $\mu$ M to 3  $\mu$ M for Omicron. Epitope sequences are provided (top). Section bound by ADAH11 is  
1141 boxed. Mutations in the Omicron RDB are highlighted (red).  $K_D$ s are indicated.  
1142

1143 **Fig. 3: Multivalent picomolar affinity Gigabody against SARS-CoV-2 RBM**

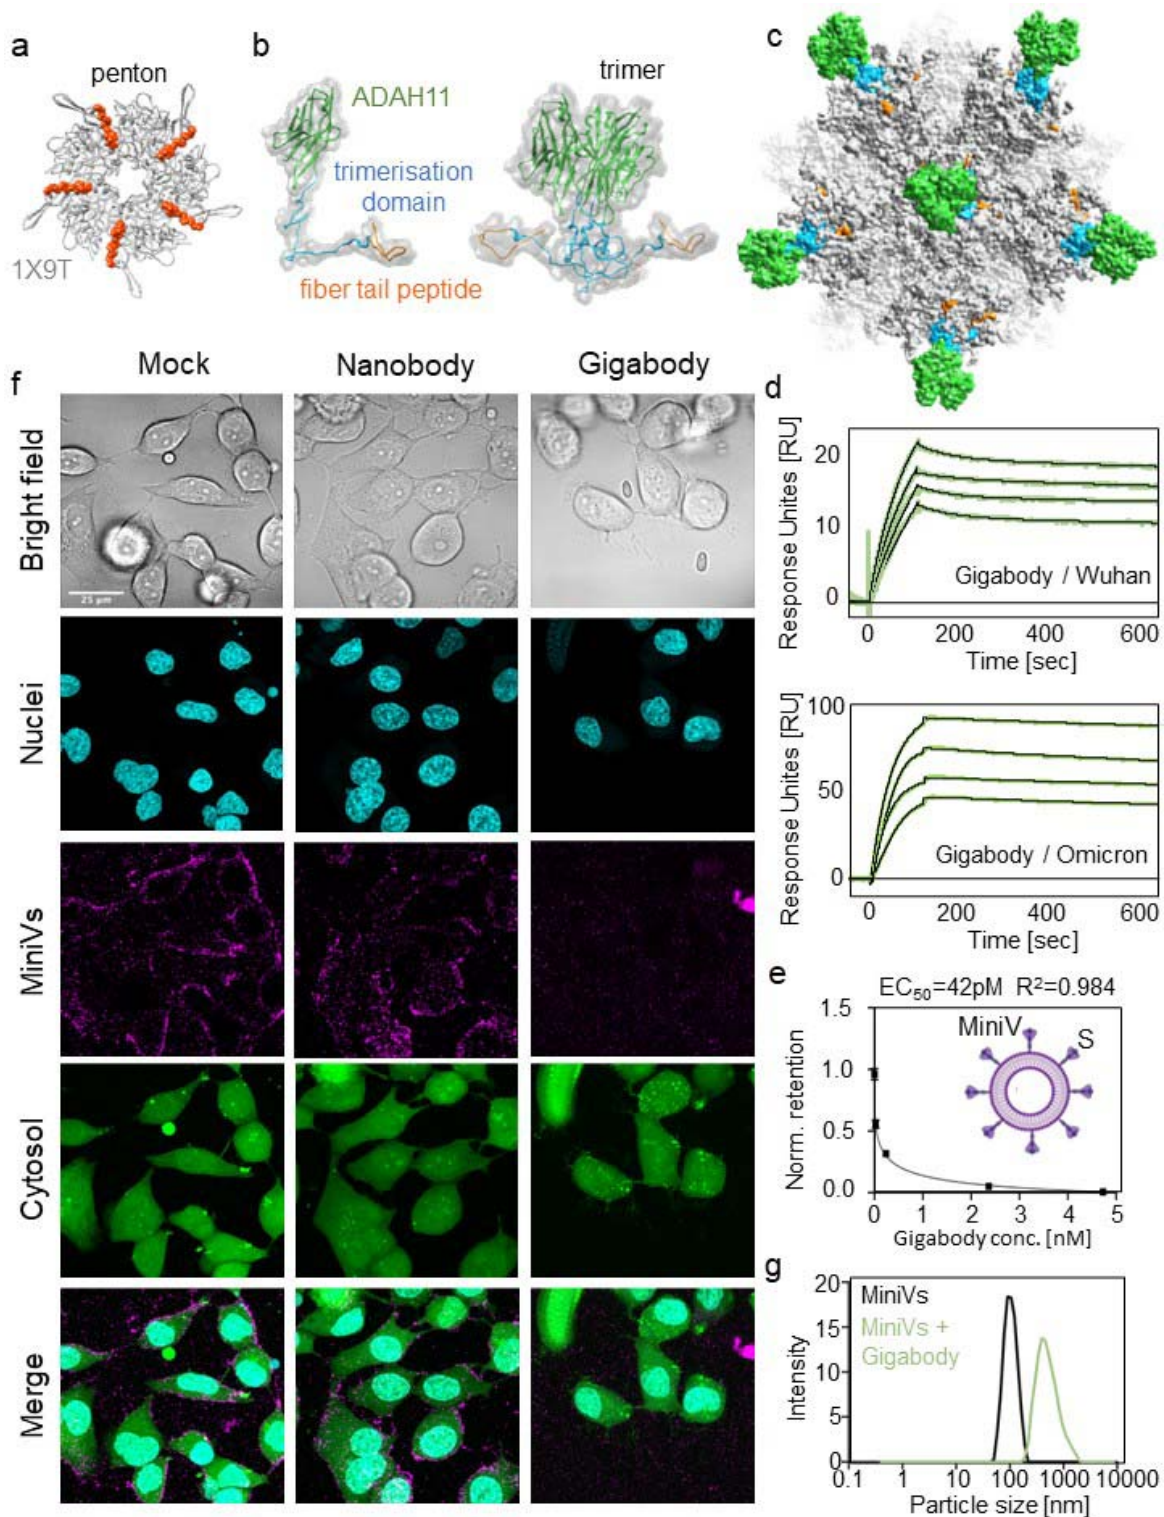

1144

1145 (a) Top view of an adenovirus penton base (grey) in complex with N-terminal fibre peptide (orange)

1146 is shown (PDBID 1X9T)<sup>35</sup>. (b) Protein engineering of ADAH11 nanobody (green) with a C-terminal

1147 T4 foldon trimerisation domain (blue) and fibre tail peptide (orange) results in a trimeric complex

1148 (right). **(c)** Gigabody comprising 12 trimers bound via fibre tail peptides to pentons, displaying a  
1149 total of 36 ADAH11 nanobodies. **(d)** SPR of Gigabody interactions with immobilised Wuhan  
1150 (above) and Omicron (below) RBDs evidence very slow dissociation, consistent with tight  
1151 (picomolar) binding. Gigabody concentrations of 0.5 to 2.0 nM (with immobilised Wuhan RBD) and  
1152 of 1 to 2.5 nM (with immobilised Omicron RBD) were used. **(e)** Quantification of MiniV retention in  
1153 ACE2-expressing A549 cell monolayers 2.5 hours after incubation. Competitive binding of  
1154 Gigabody to MiniV-presented S was assessed in a serial dilution series. Graph shows mean standard  
1155 deviations from three technical replicates. IC<sub>50</sub> is indicated. **(f)** Laser scanning confocal microscopy  
1156 images of ACE2-expressing A549 cells 2.5 hours after incubation with synthetic SARS-CoV-2  
1157 MiniVs decorated with S glycoprotein. MiniVs were either left untreated or exposed to 500 nM  
1158 ADAH11 nanobodies or 1.6 nM Gigabody (corresponding to equal final protein concentration) for  
1159 30 min before addition to the cell cultures. Scale bar is 50  $\mu$ m. **(g)** Dynamic light scattering analysis  
1160 of Gigabody-mediated MiniV aggregation. MiniVs hydrodynamic size distribution is shown for  
1161 untreated controls, and MiniVs that were pre-treated with 1.6 nM Gigabody for 30 min, respectively.  
1162



1163 **Fig. 4: ADDoCoV *in vivo* immunisation elucidates nasal vaccination route**

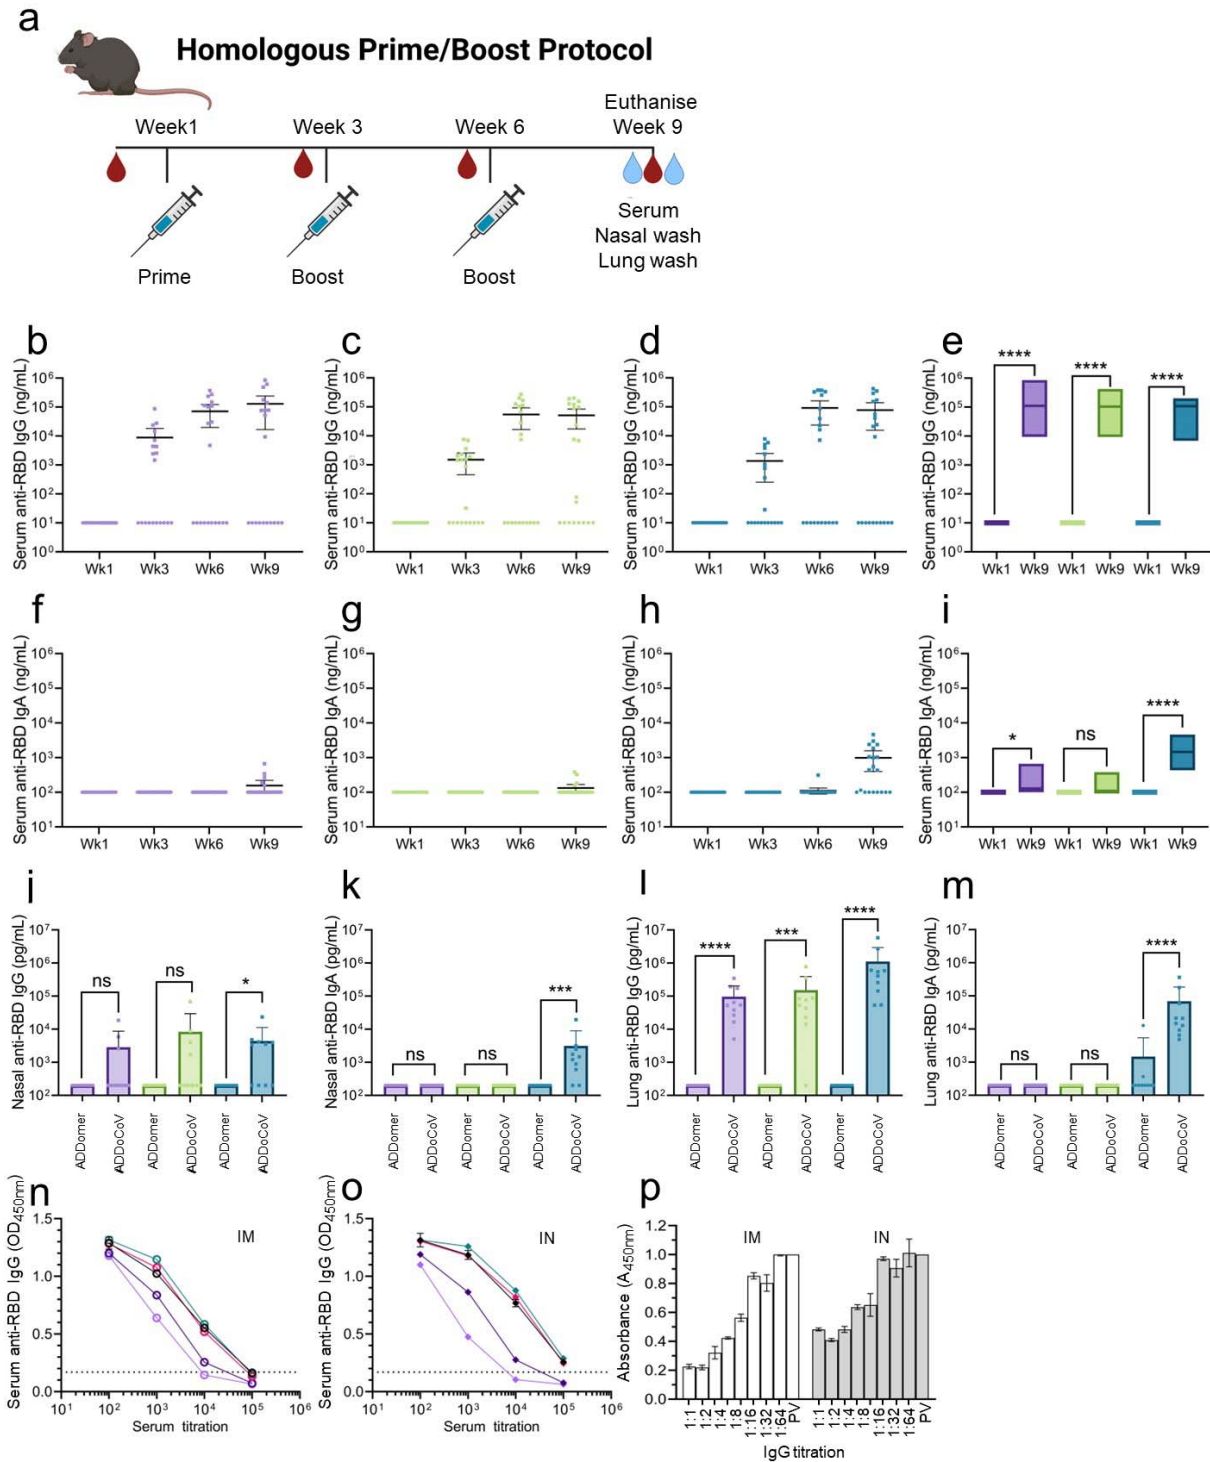

1164

1165 (a) Schematic of immunisation schedule and end point. (b–e) Determination of anti-RBD specific

1166 IgG binding antibodies induced through sub-cutaneous immunisation (purple), intra-muscular

1167 immunisation (green) and intra-nasal immunisation (blue). (f–i) Comparison of anti-RBD specific

1168 IgA binding antibodies induced through sub-cutaneous (SC) immunisation, intra-muscular (IM)  
1169 immunisation and intra-nasal (IN) immunisation. **(j,k)** Determination of anti-RBD specific IgG  
1170 binding antibodies in nasal washes induced by IM or IN immunisation. **(l,m)** Determination of anti-  
1171 RBD specific IgG binding antibodies in lung washes induced by IM or IN immunisation. Control  
1172 unvaccinated animals are represented by ●, vaccinated animals by ■ symbols. Statistical analysis  
1173 utilised two-sided Mann–Whitney tests. **(n,o)**: Assessment of cross-variant binding for total IgG  
1174 antibodies induced through IM (n) or IN (o) immunisation. Black (Alpha variant), pink (Delta), teal  
1175 (Wuhan), purple (Beta), mauve (Omicron). Dotted line represents upper 99% CI of blank controls.  
1176 **(p)** Surrogate virus neutralisation assay (sVNT)<sup>38</sup> assessing total IgG antibodies induced through  
1177 IM (white bars) or IN (grey bars) immunisation, normalised to pre-vaccination sample (PV)  
1178 included as control (bars far right). Dilutions indicated were sampled in triplicates.  
1179



1180 **Fig 5: Pipeline for ADDomer-based vaccine and Gigabody design**

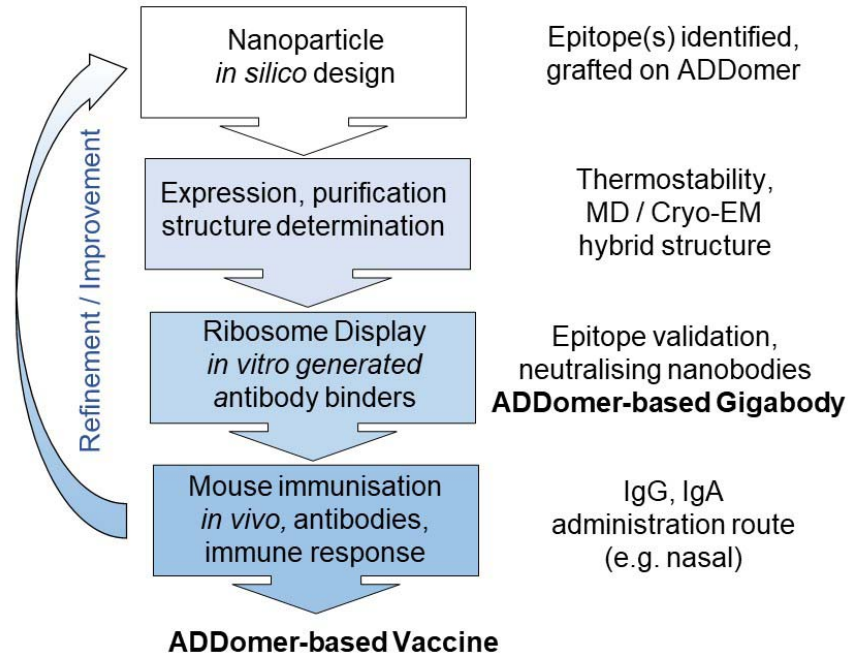

1181

1182 Integrating *in silico* design, cryo-EM, MD simulations, *in vitro* selection by Ribosome Display,  
1183 synthetic SARS-CoV-2 virions and live virus neutralisation, and validation in an animal model, for  
1184 generating ADDomer-based nanoparticle therapeutics for active (vaccine) and passive (Gigabody)  
1185 immunisation. With established protocols for each step, the process from immunogenic epitope  
1186 identification and grafting onto ADDomer, until release to animal studies, is rapid and can be  
1187 completed in about five weeks. The process can be repeated iteratively to refine and optimise, for  
1188 instance by including diverse additional B and T epitopes in the design.

1189
